# Supplementary material for: Diastereoselective reaction to construct polycyclic spiroindolines from 3-(2-isocyanoethyl)indoles and ynones
Source: Royal Society of Chemistry journal article supplement (doi:10.1039/d5nj01268f), 2025-01-01

## Supporting Information

### Diastereoselective reaction to construct polycyclic spiroindolines from 3-(2-isocyanoethyl)indoles and ynones

Demin Liang,<sup>a</sup> Da Wu,<sup>a</sup> Jie Shen,<sup>b</sup> Shanya Lu,<sup>b</sup> Jiale Wang,<sup>a</sup> Xiaodong Yan,<sup>\*a</sup> and Jian Li<sup>\*b</sup>

<sup>a</sup>. Technical Center of Shanghai Tobacco Group Co. Ltd., 3733 Xiupu Road, Shanghai 200082, P. R. China. E-mail: yanxd@sh.tobacco.com.cn

<sup>b</sup>. Department of Chemistry, College of Sciences, Shanghai University, Shanghai 200444, P. R. China. E-mail: lijian@shu.edu.cn.

### Table of contents

|                                                                               |     |
|-------------------------------------------------------------------------------|-----|
| 1. General Information.....                                                   | S2  |
| 2. General Procedures.....                                                    | S2  |
| 3. Product Characterization .....                                             | S5  |
| 4. Copies of <sup>1</sup> H NMR and <sup>13</sup> C NMR of All Compounds..... | S24 |

## 1. General Information

The NMR spectra were recorded on Bruker AC-500 spectrometer (500 MHz for  $^1\text{H}$  NMR, 125 MHz for  $^{13}\text{C}$  NMR) and JEOL ECX- 400 spectrometer (400 MHz for  $^1\text{H}$  NMR and 101 MHz for  $^{13}\text{C}$  NMR) with  $\text{CDCl}_3$  as the solvent and TMS as internal reference.  $^1\text{H}$  NMR spectral data were reported as follows: chemical shift ( $\delta$ , ppm), multiplicity, integration, and coupling constant (Hz).  $^{13}\text{C}$  NMR spectral data were reported in terms of the chemical shift. The following abbreviations were used to indicate multiplicities: s = singlet; d = doublet; t = triplet; q = quartet; m = multiplet. Low-resolution mass spectra were obtained on a Shimadzu LCMS-2010EV spectrometer in ESI mode and reported as m/z. High-resolution mass spectra (HRMS) were recorded on a Bruker Daltonics, Inc. APEXIII 7.0 TESLA FTMS instrument. Melting points were obtained on an X-4 digital melting point apparatus without correction. Purification of products was accomplished by column chromatography packed with silica gel. Unless otherwise stated, all reagents were commercially purchased and used without further purification.

## 2. General procedures

### 2.1 General procedure for the synthesis of spiroindoline 3.

Under air atmosphere, a sealable reaction tube equipped with a magnetic stir bar was charged with 3-(2-isocyanoethyl)-1H-indole **1a** (0.2 mmol), ynone **2** (0.2 mmol) and 0.2 mmol  $\text{Cs}_2\text{CO}_3$  in 2.0 mL  $\text{CHCl}_3$  at room temperature. The rubber septum was then replaced by a Teflon-coated screw cap, and the reaction vessel placed in an oil bath at 120 °C for 12 hours. After completion of the reaction, the reaction mixture was concentrated under vacuum. The residue was purified by column chromatography on silica gel to afford the desired product.

### 2.2 General procedure for the synthesis of spiroindoline 4.

Under air atmosphere, a sealable reaction tube equipped with a magnetic stir bar was charged with tryptamine-derived isocyanide **1** (0.2 mmol), ynone **2** (0.2 mmol) and 0.2 mmol  $\text{Cs}_2\text{CO}_3$  in 2.0 mL  $\text{CHCl}_3$  at room temperature. The rubber septum was then replaced by a Teflon-coated screw cap, and the reaction vessel placed in an oil bath at 120 °C for 12 hours. After completion of the reaction, the reaction mixture was concentrated under vacuum. The residue was purified by column chromatography on silica gel to afford the desired product.

## 2.3 General procedure for the control experiments.

### 2.3.1 Reaction with dialkyl- and alkyl-aryl-substituted ynone.

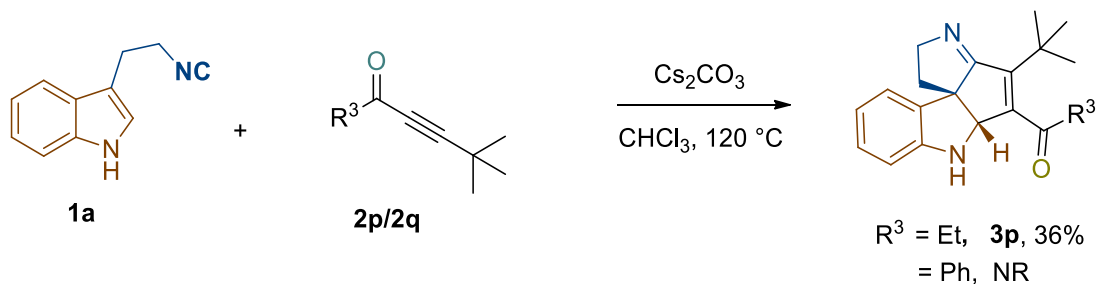

Under air atmosphere, a sealable reaction tube equipped with a magnetic stir bar was charged with 3-(2-isocyanoethyl)-1H-indole **1a** (0.2 mmol), ynone **2** (0.2 mmol) and 0.2 mmol  $\text{Cs}_2\text{CO}_3$  in 2.0 mL  $\text{CHCl}_3$  at room temperature. The rubber septum was then replaced by a Teflon-coated screw cap, and the reaction vessel placed in an oil bath at 120 °C for 12 hours. After completion of the reaction, the reaction mixture was concentrated under vacuum. The residue was purified by column chromatography on silica gel to afford the desired product.

### 2.3.2 Reaction with methyl heptine carbonate.

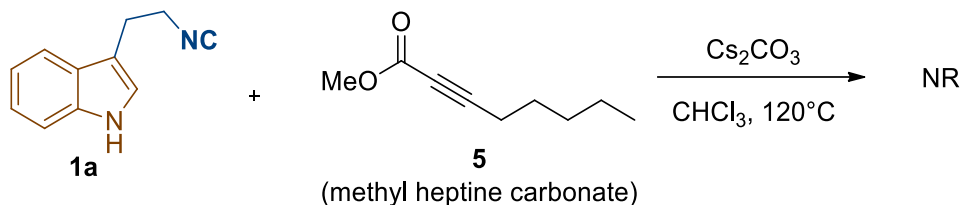

Under air atmosphere, a sealable reaction tube equipped with a magnetic stir bar was charged with 3-(2-isocyanoethyl)-1H-indole **1a** (0.2 mmol), methyl heptine carbonate **5** (0.2 mmol) and 0.2 mmol  $\text{Cs}_2\text{CO}_3$  in 2.0 mL  $\text{CHCl}_3$  at room temperature. The rubber septum was then replaced by a Teflon-coated screw cap, and the reaction vessel placed in an oil bath at 120 °C for 12 hours. The analysis of TLC showed that no reaction occurred.

### 2.3.3 Reaction with allenic ketone.

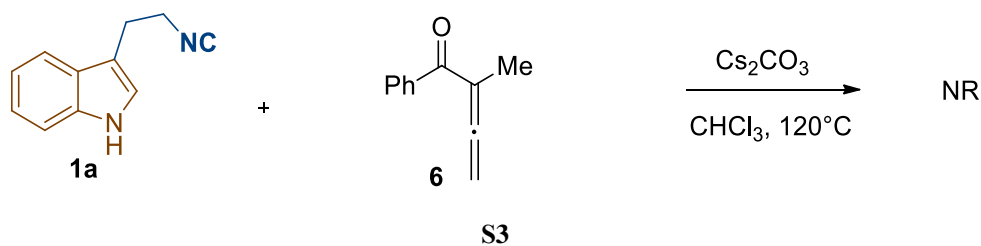

Under air atmosphere, a sealable reaction tube equipped with a magnetic stir bar was charged with 3-(2-isocyanoethyl)-1H-indole **1a** (0.2 mmol), allenic ketone **6** (0.2 mmol) and 0.2 mmol Cs<sub>2</sub>CO<sub>3</sub> in 2.0 mL CHCl<sub>3</sub> at room temperature. The rubber septum was then replaced by a Teflon-coated screw cap, and the reaction vessel placed in an oil bath at 120 °C for 12 hours. The analysis of TLC showed that no reaction occurred.

#### 2.3.4 Reaction with cyclocitral-derived malononitrile.

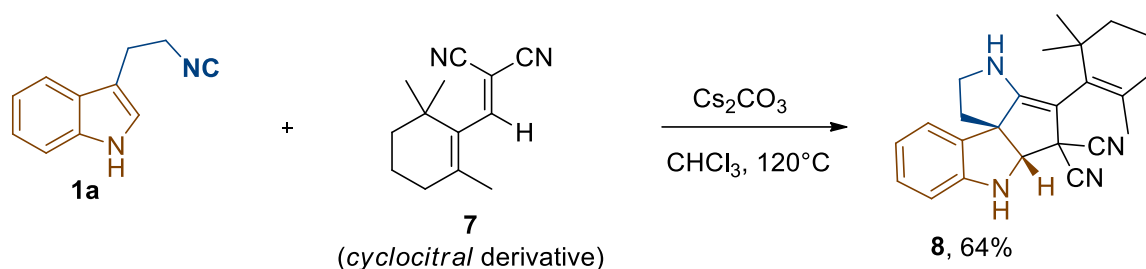

Under air atmosphere, a sealable reaction tube equipped with a magnetic stir bar was charged with 3-(2-isocyanoethyl)-1H-indole **1a** (0.2 mmol), cyclocitral-derived malononitrile **7** (0.2 mmol) and 0.2 mmol Cs<sub>2</sub>CO<sub>3</sub> in 2.0 mL CHCl<sub>3</sub> at room temperature. The rubber septum was then replaced by a Teflon-coated screw cap, and the reaction vessel placed in an oil bath at 120 °C for 12 hours. After the completion of the reaction, the organic solvent was removed under vacuum and the residue was purified by column chromatography to afford **8** (64% yield) as yellow oil.

#### 2.3.5 Reaction with megastigmatrienone.

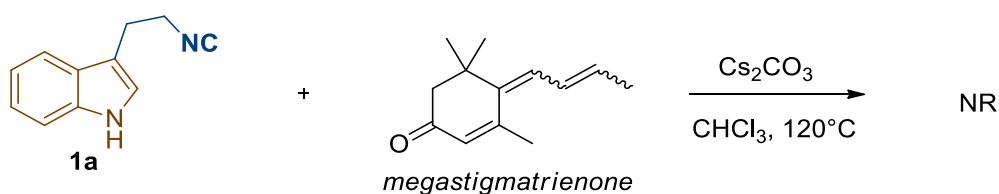

Under air atmosphere, a sealable reaction tube equipped with a magnetic stir bar was charged with 3-(2-isocyanoethyl)-1H-indole **1a** (0.2 mmol), megastigmatrienone (0.2 mmol) and 0.2 mmol Cs<sub>2</sub>CO<sub>3</sub> in 2.0 mL CHCl<sub>3</sub> at room temperature. The rubber septum was then replaced by a Teflon-coated screw cap, and the reaction vessel placed in an oil bath at 120 °C for 12 hours. The analysis of TLC showed that no reaction occurred.

### 3. Product Characterization

#### Spectroscopic Data of All Compounds

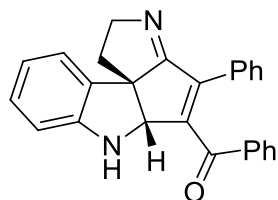

(**3a**): 60 mg, 80% yield, yellow solid. m.p. 48-50 °C.  $^1\text{H}$  NMR (400 MHz, Chloroform-*d*)  $\delta$  7.55 (d,  $J$  = 7.8 Hz, 2H), 7.39-7.32 (m, 3H), 7.23 (d,  $J$  = 7.5 Hz, 1H), 7.20-7.09 (m, 6H), 6.83 (t,  $J$  = 7.5 Hz, 1H), 6.64 (d,  $J$  = 7.8 Hz, 1H), 4.92 (s, 1H), 4.76-4.64 (m, 1H), 4.55-4.45 (m, 1H), 4.40 (s, 1H), 2.42-2.34 (m, 2H).  $^{13}\text{C}$  NMR (101 MHz, Chloroform-*d*)  $\delta$  197.13, 187.13, 152.55, 148.21, 140.35, 136.31, 133.77, 132.13, 130.66, 129.40, 129.36, 129.18, 128.55, 128.31, 123.61, 120.13, 111.17, 68.74, 68.19, 66.80, 38.52. HRMS (ESI): Calcd. for  $\text{C}_{26}\text{H}_{21}\text{N}_2\text{O}$   $[\text{M}+\text{H}]^+$ : 377.1654, Found: 377.1658.

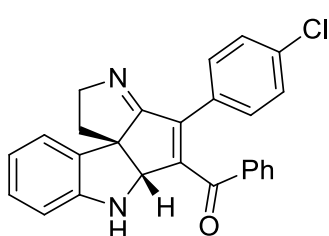

(**3b**): 57 mg, 70% yield, yellow solid. m.p. 180-182 °C.  $^1\text{H}$  NMR (400 MHz, Chloroform-*d*)  $\delta$  7.57-7.52 (m, 2H), 7.44-7.39 (m, 1H), 7.33-7.29 (m, 2H), 7.23-7.18 (m, 3H), 7.14-7.10 (m, 1H), 7.10-7.06 (m, 2H), 6.82 (td,  $J$  = 7.5, 1.0 Hz, 1H), 6.63 (dt,  $J$  = 7.9, 0.8 Hz, 1H), 4.89 (s, 1H), 4.72-4.62 (m, 1H), 4.48 (m, 1H), 4.39 (s, 1H), 2.42-2.31 (m, 2H).  $^{13}\text{C}$  NMR (101 MHz, Chloroform-*d*)  $\delta$  196.87, 186.83, 153.10, 148.13, 138.70, 136.09, 135.36, 134.10, 132.00, 130.64, 129.34, 129.28, 129.17, 128.74, 128.59, 123.57, 120.24, 111.26, 68.77, 68.27, 66.80, 38.52. HRMS (ESI): Calcd. for  $\text{C}_{26}\text{H}_{20}\text{ClN}_2\text{O}$   $[\text{M}+\text{H}]^+$ : 411.1264, Found: 411.1260.

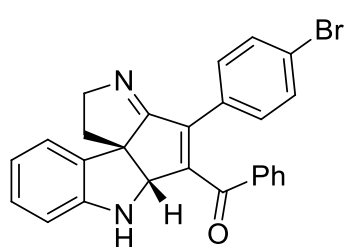

**(3c)**: 39 mg, 43% yield, red solid. m.p. 189-191 °C.  $^1\text{H}$  NMR (400 MHz, DMSO- $d_6$ )  $\delta$  7.56-7.52 (m, 2H), 7.49-7.45 (m, 1H), 7.30 (t,  $J$  = 7.8 Hz, 2H), 7.25 (dd,  $J$  = 7.3, 2.4 Hz, 2H), 7.16 (dd,  $J$  = 3.7, 2.0 Hz, 3H), 7.14 (d,  $J$  = 1.6 Hz, 1H), 7.04 (dd,  $J$  = 8.4, 2.2 Hz, 1H), 6.49 (d,  $J$  = 8.2 Hz, 2H), 4.98 (d,  $J$  = 2.1 Hz, 1H), 4.63 (m, 1H), 4.26 (dd,  $J$  = 15.9, 8.3 Hz, 1H), 2.46 (d,  $J$  = 1.9 Hz, 2H), 2.39-2.29 (m, 1H), 2.10 (dd,  $J$  = 12.4, 5.5 Hz, 1H).  $^{13}\text{C}$  NMR (101 MHz, DMSO- $d_6$ )  $\delta$  196.47, 185.83, 154.40, 148.32, 138.45, 136.43, 134.54, 134.14, 130.95, 129.68, 129.36, 129.27, 129.14, 128.78, 123.61, 121.82, 111.54, 68.98, 68.50, 66.39, 38.48. HRMS (ESI): Calcd. for  $\text{C}_{26}\text{H}_{20}\text{BrN}_2\text{O}$   $[\text{M}+\text{H}]^+$ : 455.0759, Found: 455.0769.

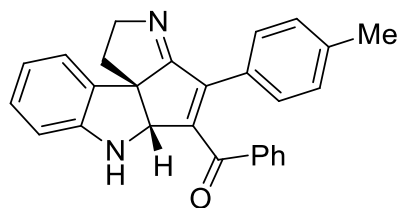

**(3d)**: 44 mg, 57% yield, viscous oil.  $^1\text{H}$  NMR (400 MHz, Chloroform- $d$ )  $\delta$  7.57 (d,  $J$  = 8.9 Hz, 2H), 7.40-7.36 (m, 1H), 7.27-7.18 (m, 5H), 7.11 (t,  $J$  = 7.7 Hz, 1H), 6.91 (d,  $J$  = 7.8 Hz, 2H), 6.82 (t,  $J$  = 7.4 Hz, 1H), 6.63 (d,  $J$  = 7.7 Hz, 1H), 4.90 (s, 1H), 4.75-4.62 (m, 1H), 4.55-4.44 (m, 1H), 4.39 (s, 1H), 2.39-2.33 (m, 2H), 2.18 (s, 3H).  $^{13}\text{C}$  NMR (101 MHz, Chloroform- $d$ )  $\delta$  197.31, 187.23, 151.64, 148.26, 140.17, 139.45, 136.40, 133.71, 132.22, 129.38, 129.12, 129.02, 128.57, 127.73, 123.61, 120.06, 111.13, 68.74, 68.13, 66.75, 38.51, 21.35. HRMS (ESI): Calcd. for  $\text{C}_{27}\text{H}_{23}\text{N}_2\text{O}$   $[\text{M}+\text{H}]^+$ : 391.1810, Found: 391.1801.

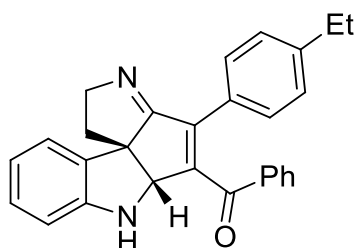

**(3e)**: 62 mg, 75% yield, red solid. m.p. 161-163 °C.  $^1\text{H}$  NMR (400 MHz, Chloroform-*d*)  $\delta$  7.57 (dd,  $J = 8.4, 1.3$  Hz, 2H), 7.39-7.34 (m, 1H), 7.29-7.26 (m, 2H), 7.23 (d,  $J = 6.8$  Hz, 1H), 7.20-7.16 (m, 2H), 7.11 (td,  $J = 7.7, 1.3$

Hz, 1H), 6.93 (d,  $J = 8.1$  Hz, 2H), 6.82 (td,  $J = 7.5, 1.0$  Hz, 1H), 6.62 (d,  $J = 7.9$  Hz, 1H), 4.90 (s, 1H), 4.73-4.63 (m, 1H), 4.53-4.39 (m, 2H), 2.46 (q,  $J = 7.6$  Hz, 2H), 2.39-2.33 (m, 2H), 1.06 (t,  $J = 7.6$  Hz, 3H).  $^{13}\text{C}$  NMR (101 MHz, Chloroform-*d*)  $\delta$  197.30, 187.29, 151.71, 148.28, 145.75, 140.30, 136.43, 133.67, 132.20, 129.49, 129.39, 129.13, 128.55, 127.94, 127.85, 123.61, 120.04, 111.12, 68.75, 68.12, 66.75, 38.51, 28.71, 15.40. HRMS (ESI): Calcd. for  $\text{C}_{28}\text{H}_{25}\text{N}_2\text{O}$   $[\text{M}+\text{H}]^+$ : 405.1967, Found: 405.1975.

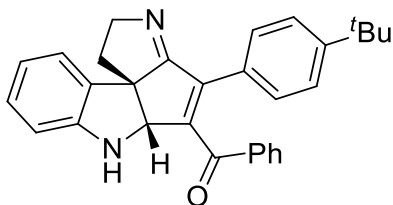

**(3f)**: 45 mg, 52% yield, viscous oil.  $^1\text{H}$  NMR (400 MHz, Chloroform-*d*)  $\delta$  7.49-7.45 (m, 2H), 7.40-7.36 (m, 2H), 7.22 (d,  $J = 7.6$  Hz, 1H), 7.14-7.09 (m, 4H), 6.98 (d,  $J = 7.2$  Hz, 2H), 6.82 (t,  $J = 7.8$  Hz, 1H), 6.62

(d,  $J = 7.5$  Hz, 1H), 4.88 (s, 1H), 4.77-4.60 (m, 1H), 4.55-4.44 (m, 1H), 4.35 (s, 1H), 2.38-2.33 (m, 2H), 2.26 (s, 9H).  $^{13}\text{C}$  NMR (101 MHz, Chloroform-*d*)  $\delta$  197.27, 187.30, 152.49, 151.72, 148.25, 140.37, 136.47, 133.59, 132.18, 129.42, 129.20, 129.12, 128.53, 127.64, 125.25, 123.61, 122.75, 122.40, 120.05, 119.75, 118.24, 111.53, 111.10, 68.74, 68.07, 66.76, 38.48, 34.64, 31.07. HRMS (ESI): Calcd. for  $\text{C}_{30}\text{H}_{29}\text{N}_2\text{O}$   $[\text{M}+\text{H}]^+$ : 433.2280, Found: 433.2280.

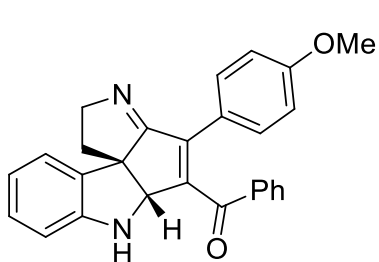

**(3g)**: 32 mg, 39% yield, red solid. m.p. 175-176 °C.

$^1\text{H}$  NMR (400 MHz, Chloroform-*d*)  $\delta$  7.58-7.53 (m, 2H), 7.40-7.35 (m, 1H), 7.32 (d,  $J = 2.1$  Hz, 1H), 7.30 (d,  $J = 2.1$  Hz, 1H), 7.19 (qd,  $J = 7.2, 6.7, 1.4$

Hz, 3H), 7.10 (td,  $J = 7.7, 1.2$  Hz, 1H), 6.80 (td,  $J = 7.5, 1.0$  Hz, 1H), 6.65-6.59 (m, 3H), 4.88 (s, 1H), 4.72-4.62 (m, 1H), 4.47 (m, 1H), 4.39 (s, 1H), 3.66 (s, 3H), 2.39-2.30 (m, 2H).  $^{13}\text{C}$  NMR (101 MHz, Chloroform-*d*)  $\delta$  197.40, 187.37, 160.38, 150.63, 148.30, 139.84, 136.42, 133.73, 132.20, 131.09, 129.37, 129.12, 128.60, 123.59, 123.10, 120.02, 113.77, 111.12, 68.69, 68.04, 66.74, 55.27, 38.51. HRMS (ESI): Calcd. for  $\text{C}_{27}\text{H}_{23}\text{N}_2\text{O}_2$   $[\text{M}+\text{H}]^+$ : 407.1760, Found: 407.1771.

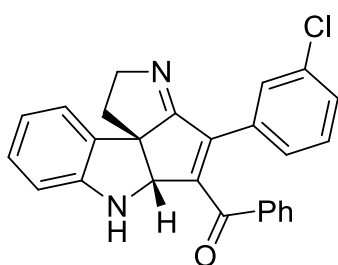

**(3h)**: 49 mg, 60% yield, 120-121 °C.  $^1\text{H}$  NMR (400 MHz,

Chloroform-*d*)  $\delta$  7.54 (d,  $J = 7.8$  Hz, 2H), 7.43-7.38 (m, 2H), 7.24-7.08 (m, 6H), 7.02 (t,  $J = 7.8$  Hz, 1H), 6.84 (t,  $J = 7.4$  Hz, 1H), 6.65 (d,  $J = 7.8$  Hz, 1H), 4.92 (s, 1H),

4.75-4.62 (m, 1H), 4.53-4.46 (m, 1H), 4.43 (s, 1H), 2.43-2.33 (m, 2H).  $^{13}\text{C}$  NMR (101 MHz, Chloroform-*d*)  $\delta$  196.73, 186.60, 153.78, 148.11, 138.77, 136.22, 134.27, 133.99, 132.44, 131.95, 129.53, 129.35, 129.30, 129.25, 128.68, 127.46, 123.60, 120.27, 111.24, 68.75, 68.28, 66.85, 38.53. HRMS (ESI): Calcd. for  $\text{C}_{26}\text{H}_{20}\text{ClN}_2\text{O}$   $[\text{M}+\text{H}]^+$ : 411.1264, Found: 411.1269.



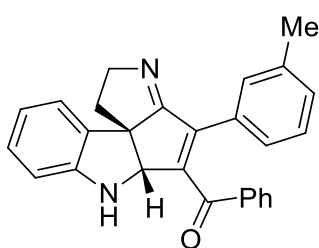

**(3i)**: 42 mg, 54% yield, yellow solid. m.p. 45-46 °C.  $^1\text{H}$  NMR (400 MHz, Chloroform-*d*)  $\delta$  7.53-7.50 (m, 2H), 7.35 (t, 1H), 7.23 (d,  $J = 6.5$  Hz, 1H), 7.18-7.11 (m, 5H), 6.91 (d,  $J = 7.6$  Hz, 2H), 6.81 (t,  $J = 7.6$  Hz, 1H), 6.63 (d,  $J = 6.8$  Hz, 1H), 4.91 (s, 1H), 4.75-4.62 (m, 1H), 4.53-4.43 (m, 1H), 4.40 (s, 1H), 2.39-2.34 (m, 2H), 2.11 (s, 3H).  $^{13}\text{C}$  NMR (101 MHz, Chloroform-*d*)  $\delta$  197.33, 187.24, 151.62, 148.25, 140.18, 139.46, 136.38, 133.73, 132.21, 129.39, 129.13, 129.03, 128.58, 127.71, 123.62, 120.06, 111.14, 68.73, 68.11, 66.76, 38.52, 21.37. HRMS (ESI): Calcd. for  $\text{C}_{27}\text{H}_{23}\text{N}_2\text{O}$   $[\text{M}+\text{H}]^+$ : 391.1810, Found: 391.1815. HRMS (ESI): Calcd. for  $\text{C}_{27}\text{H}_{23}\text{N}_2\text{O}$   $[\text{M}+\text{H}]^+$ : 391.1810, Found: 391.1803.

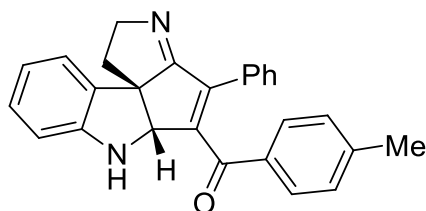

**(3j)**: 47 mg, 60% yield, viscous oil.  $^1\text{H}$  NMR (400 MHz, Chloroform-*d*)  $\delta$  7.50-7.46 (m, 2H), 7.41-7.37 (m, 2H), 7.23 (d,  $J = 7.4$  Hz, 1H), 7.15-7.10 (m, 4H), 6.99 (d,  $J = 7.9$  Hz, 2H), 6.83 (t,  $J = 7.5$  Hz, 1H), 6.63 (d,  $J = 7.8$  Hz, 1H), 4.89 (s, 1H), 4.78-4.61 (m, 1H), 4.57-4.45 (m, 1H), 4.36 (s, 1H), 2.40-2.34 (m, 2H), 2.27 (s, 3H).  $^{13}\text{C}$  NMR (101 MHz, Chloroform-*d*)  $\delta$  196.67, 187.12, 152.94, 148.23, 145.03, 139.42, 133.76, 132.18, 130.74, 129.57, 129.37, 129.31, 129.24, 129.15, 128.34, 123.60, 120.10, 111.15, 68.77, 68.19, 66.78, 38.44, 21.81. HRMS (ESI): Calcd. for  $\text{C}_{27}\text{H}_{23}\text{N}_2\text{O}$   $[\text{M}+\text{H}]^+$ : 391.1810, Found: 391.1822.

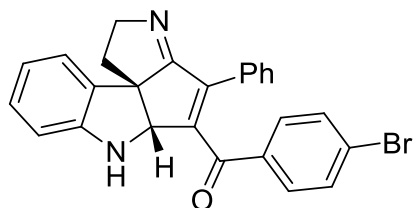

**(3k)**: 65 mg, 72% yield, 135-136 °C.  $^1\text{H}$  NMR (400 MHz, Chloroform-*d*)  $\delta$  7.38 (d,  $J$  = 8.6 Hz, 2H), 7.34-7.28 (m, 4H), 7.24 (d,  $J$  = 7.6 Hz, 1H), 7.17-7.11 (m, 4H), 6.84 (t,  $J$  = 7.4 Hz, 1H), 6.64 (d,  $J$  = 7.9 Hz, 1H), 4.93 (s, 1H), 4.76-4.63 (m, 1H), 4.55-4.44 (m, 1H), 4.39 (s, 1H), 2.41-2.33 (m, 2H).  $^{13}\text{C}$  NMR (101 MHz, Chloroform-*d*)  $\delta$  196.18, 186.97, 152.08, 148.08, 140.60, 135.13, 132.21, 131.89, 130.73, 130.44, 129.63, 129.40, 129.26, 129.10, 128.48, 123.64, 120.33, 111.35, 68.78, 68.36, 66.82, 38.55. HRMS (ESI): Calcd. for  $\text{C}_{26}\text{H}_{20}\text{BrN}_2\text{O}$   $[\text{M}+\text{H}]^+$ : 455.0759, Found: 455.0769.

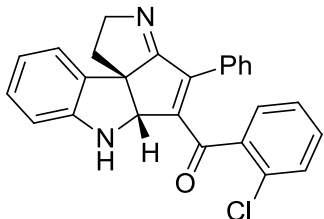

**(3l)**: 61 mg, 75% yield, yellow solid: 58-60 °C.  $^1\text{H}$  NMR (400 MHz, Chloroform-*d*)  $\delta$  7.19-7.11 (m, 4H), 7.09-7.02 (m, 6H), 6.95 -6.89 (m, 1H), 6.78 (t,  $J$  = 7.4 Hz, 1H), 6.68 (d,  $J$  = 7.8 Hz, 1H), 4.97 (s, 1H), 4.71 (s, 1H), 4.69-4.58 (m, 1H), 4.52-4.41 (m, 1H), 2.44-2.33 (m, 2H).  $^{13}\text{C}$  NMR (101 MHz, Chloroform-*d*)  $\delta$  195.44, 187.74, 151.74, 148.68, 145.50, 137.63, 132.15, 132.08, 131.36, 130.49, 130.45, 130.21, 129.32, 129.19, 127.84, 126.38, 123.62, 119.70, 110.64, 67.94, 67.44, 66.81, 38.70. HRMS (ESI): Calcd. for  $\text{C}_{26}\text{H}_{20}\text{ClN}_2\text{O}$   $[\text{M}+\text{H}]^+$ : 411.1264, Found: 411.1270.

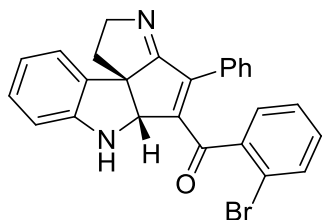

**(3m)**: 65 mg, 72% yield, yellow solid. m.p. 180-181 °C.  $^1\text{H}$

NMR (400 MHz, Chloroform-*d*)  $\delta$  7.25-7.21 (m, 1H), 7.17-

7.10 (m, 4H), 7.06 -6.93 (m, 6H), 6.77 (t,  $J$  = 7.4 Hz, 1H),

6.67 (d,  $J$  = 7.8 Hz, 1H), 4.96 (s, 1H), 4.71 (s, 1H), 4.67-

4.57 (m, 1H), 4.52-4.40 (m, 1H), 2.42-2.32 (m, 2H).  $^{13}\text{C}$  NMR (101 MHz, Chloroform-

*d*)  $\delta$  195.99, 187.82, 151.29, 148.78, 145.92, 139.39, 133.50, 132.09, 131.29, 130.63,

130.45, 129.32, 129.20, 127.82, 126.91, 123.63, 120.44, 119.67, 110.60, 67.97, 67.32,

66.81, 38.74. HRMS (ESI): Calcd. for  $\text{C}_{26}\text{H}_{20}\text{BrN}_2\text{O}$   $[\text{M}+\text{H}]^+$ : 455.0759, Found:

455.0760.

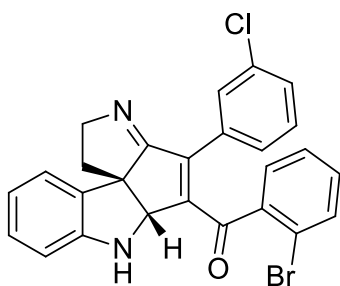

**(3n)** 80 mg, 82% yield, red solid. m.p. 195-197 °C.  $^1\text{H}$

NMR (400 MHz, Chloroform-*d*)  $\delta$  7.26 (d,  $J$  = 7.7 Hz,

1H), 7.18-7.11 (m, 2H), 7.03 (m, 7H), 6.78 (t,  $J$  = 7.4

Hz, 1H), 6.68 (d,  $J$  = 7.9 Hz, 1H), 4.97 (s, 1H), 4.75 (s,

1H), 4.67-4.57 (m, 1H), 4.46 (dd,  $J$  = 16.1, 7.4 Hz, 1H),

2.44 -2.32 (m, 2H).  $^{13}\text{C}$  NMR (101 MHz, Chloroform-*d*)  $\delta$  195.68, 187.40, 152.04,

148.71, 144.40, 139.31, 133.78, 133.48, 132.31, 132.20, 131.03, 130.47, 129.30,

129.13, 127.28, 127.11, 123.62, 120.19, 119.76, 110.62, 67.88, 67.28, 66.87, 38.77.

HRMS (ESI): Calcd. for  $\text{C}_{26}\text{H}_{19}\text{BrClN}_2\text{O}$   $[\text{M}+\text{H}]^+$ : 489.0369, Found: 489.0358.

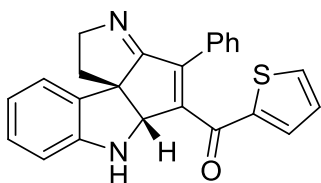

**(3o)**: 17 mg, 22% yield, red solid. m.p. 156-157 °C.  $^1\text{H}$

NMR (400 MHz, Chloroform-*d*)  $\delta$  7.52 (d,  $J = 5.2$  Hz, 1H), 7.45 (dd,  $J = 6.7, 3.0$  Hz, 2H), 7.23-7.16 (m, 4H),

7.10 (t,  $J = 7.7$  Hz, 1H), 7.03 (d,  $J = 3.8$  Hz, 1H), 6.80 (t,  $J = 7.4$  Hz, 1H), 6.75 (t,  $J = 4.4$  Hz, 1H), 6.63 (d,  $J = 7.9$  Hz, 1H), 4.88 (s, 1H), 4.73-4.57 (m, 1H), 4.47 (m, 2H), 2.35 (dd,  $J = 9.3, 5.9$  Hz, 2H).  $^{13}\text{C}$  NMR (101 MHz, Chloroform-*d*)  $\delta$  188.62, 186.96, 152.67, 148.14, 143.31, 139.60, 135.65, 135.50, 132.10, 130.85, 129.41, 129.28, 129.16, 128.50, 128.39, 123.56, 120.13, 111.20, 68.60, 68.34, 66.78, 38.39. HRMS (ESI): Calcd. for  $\text{C}_{24}\text{H}_{19}\text{N}_2\text{OS}$   $[\text{M}+\text{H}]^+$ : 383.1218, Found: 383.1220.

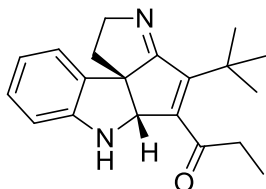

**(3p)**: 22 mg, 36% yield, viscous oil.  $^1\text{H}$  NMR (400 MHz,

Chloroform-*d*)  $\delta$  7.13-7.09 (m, 1H), 7.03 (d,  $J = 7.4$  Hz, 1H), 6.78-6.72 (m, 2H), 4.56-4.32 (m, 3H), 4.20 (brs, 1H), 2.79-

2.62 (m, 2H), 2.19-2.15 (m, 2H), 1.20 (s, 9H), 1.14 (t,  $J = 7.6$  Hz, 3H).  $^{13}\text{C}$  NMR (101 MHz, Chloroform-*d*)  $\delta$  207.80, 186.94, 152.77, 147.78, 144.32, 132.89, 128.87, 123.08, 120.44, 111.88, 68.56, 67.85, 66.36, 38.53, 37.79, 33.69, 29.31, 7.35. HRMS (ESI): Calcd. for  $\text{C}_{20}\text{H}_{25}\text{N}_2\text{O}$   $[\text{M}+\text{H}]^+$ : 309.1967, Found: 309.1960.

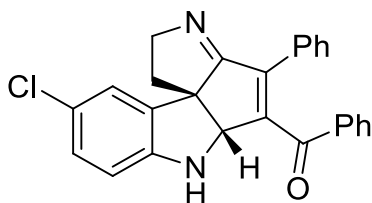

**(4a)**: 62 mg, 75% yield, red solid. m.p. 200-202 °C.

$^1\text{H}$  NMR (400 MHz, Chloroform-*d*)  $\delta$  7.56-7.53 (m, 2H), 7.43-7.32 (m, 4H), 7.30 (d,  $J$  = 2.0 Hz, 1H),

7.23-7.18 (m, 3H), 7.14-7.10 (m, 3H), 6.51 (d,  $J$  = 8.3 Hz, 1H), 4.93 (s, 1H), 4.72-4.60 (m, 1H), 4.56-4.43 (m, 2H), 2.40-2.34 (m, 2H).  $^{13}\text{C}$  NMR (101 MHz, Chloroform-*d*)  $\delta$  196.86, 186.43, 152.08, 147.33, 140.60, 136.18, 134.16, 133.88, 131.99, 130.43, 129.53, 129.47, 129.33, 128.61, 128.36, 126.64, 112.39, 111.41, 68.97, 68.04, 66.79, 38.46. HRMS (ESI): Calcd. for  $\text{C}_{26}\text{H}_{20}\text{ClN}_2\text{O}$   $[\text{M}+\text{H}]^+$ : 411.1264, Found: 411.1265.

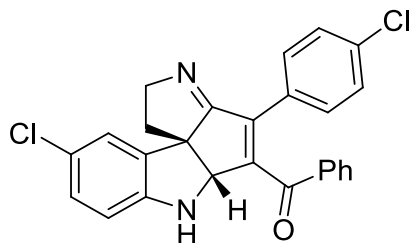

**(4b)**: 52mg, 58% yield, red solid. m.p. 185-187 °C.

$^1\text{H}$  NMR (400 MHz, Chloroform-*d*)  $\delta$  7.59-7.51 (m, 2H), 7.44 (t,  $J$  = 7.4 Hz, 1H), 7.32 (d,  $J$  = 8.5 Hz, 1H), 7.23 (t,  $J$  = 7.8 Hz, 2H), 7.15 (d,  $J$  = 2.1 Hz,

1H), 7.12-7.06 (m, 5H), 6.56 (d,  $J$  = 8.4 Hz, 1H), 4.92 (s, 1H), 4.72-4.59 (m, 1H), 4.50 (m, 1H), 4.42 (s, 1H), 2.43-2.31 (m, 2H).  $^{13}\text{C}$  NMR (101 MHz, Chloroform-*d*)  $\delta$  196.62, 186.12, 152.67, 146.78, 138.91, 135.95, 135.57, 134.21, 133.59, 130.69, 129.31, 129.25, 128.93, 128.80, 128.65, 124.58, 123.81, 112.01, 69.10, 68.18, 66.81, 38.41. HRMS (ESI): Calcd. for  $\text{C}_{26}\text{H}_{19}\text{Cl}_2\text{N}_2\text{O}$   $[\text{M}+\text{H}]^+$ : 445.0874, Found: 445.0879.

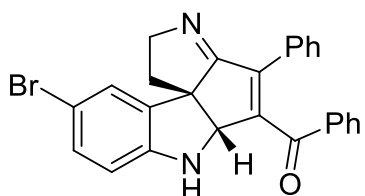

(**4c**): 48 mg, 46% yield, red solid. m.p. 172-174 °C. <sup>1</sup>H

NMR (400 MHz, Chloroform-*d*) δ 7.57-7.52 (m, 2H),

7.40-7.33 (m, 3H), 7.30 (d, *J* = 2.0 Hz, 1H), 7.22-7.16 (m,

3H), 7.14-7.08 (m, 3H), 6.51 (d, *J* = 8.3 Hz, 1H), 4.93 (s,

1H), 4.71-4.60 (m, 1H), 4.54-4.42 (m, 2H), 2.42-2.33 (m, 2H). <sup>13</sup>C NMR (101 MHz,

Chloroform-*d*) δ 196.85, 186.41, 152.03, 147.32, 140.62, 136.18, 134.16, 133.87,

131.99, 130.43, 129.53, 129.46, 129.33, 128.61, 128.36, 126.65, 112.39, 111.42, 68.97,

68.03, 66.80, 38.47. HRMS (ESI): Calcd. for C<sub>26</sub>H<sub>20</sub>BrN<sub>2</sub>O [M+H]<sup>+</sup>: 455.0759, Found:

455.0763.

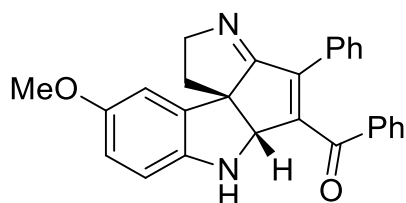

(**4d**): 45 mg, 56% yield, red solid. m.p. 140-141

°C. <sup>1</sup>H NMR (400 MHz, Chloroform-*d*) δ 7.58-7.49

(m, 2H), 7.40-7.29 (m, 3H), 7.21-7.07 (m, 5H), 7.09

(dd, *J* = 5.4, 3.6 Hz, 4H), 6.81 (d, *J* = 2.6 Hz, 1H),

6.70 (dd, *J* = 8.5, 2.5 Hz, 1H), 6.59 (d, *J* = 8.5 Hz, 1H), 4.91 (s, 1H), 4.66 (m, 1H), 4.47

(m, 1H), 4.23-4.04 (m, 1H), 3.77 (s, 3H), 2.42-2.29 (m, 2H). <sup>13</sup>C NMR (101 MHz,

Chloroform-*d*) δ 197.21, 186.97, 154.58, 153.31, 142.10, 139.80, 136.35, 134.22,

133.75, 130.64, 129.36, 129.30, 128.52, 128.31, 114.35, 112.59, 109.81, 69.63, 69.03,

66.79, 55.97, 38.08. HRMS (ESI): Calcd. for C<sub>27</sub>H<sub>23</sub>N<sub>2</sub>O<sub>2</sub> [M+H]<sup>+</sup>: 407.1760, Found:

407.1770.

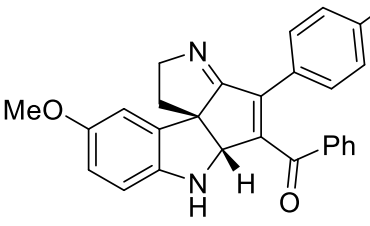
**(4e)**: 56 mg, 64% yield, red solid. m.p. 142-143 °C. <sup>1</sup>H NMR (400 MHz, Chloroform-*d*) δ 7.55 (dd, *J* = 8.2, 1.3 Hz, 2H), 7.37-7.32 (m, 1H), 7.28 (s, 1H), 7.26 (s, 1H), 7.17 (t, *J* = 7.8 Hz, 2H), 6.92 (d, *J* = 8.2 Hz, 2H), 6.81 (d, *J* = 2.5 Hz, 1H), 6.69 (dd, *J* = 8.5, 2.6 Hz, 1H), 6.57 (d, *J* = 8.5 Hz, 1H), 4.89 (s, 1H), 4.66 (m, 1H), 4.46 (dd, *J* = 14.9, 6.5 Hz, 1H), 4.17 (s, 1H), 3.76 (s, 3H), 2.45 (q, *J* = 7.6 Hz, 2H), 2.33 (t, *J* = 8.1 Hz, 2H), 1.05 (t, *J* = 7.6 Hz, 3H). <sup>13</sup>C NMR (101 MHz, Chloroform-*d*) δ 197.40, 187.13, 154.52, 152.45, 145.71, 142.17, 139.73, 136.45, 134.29, 133.66, 129.44, 128.53, 127.87, 114.31, 112.54, 109.83, 69.63, 68.95, 66.75, 55.97, 38.07, 28.70, 15.39.

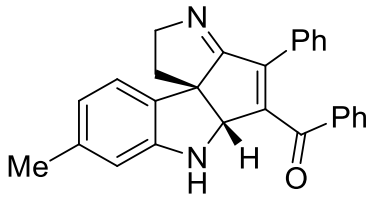
**(4f)**: 41 mg, 53% yield, red solid. m.p. 153-155 °C. <sup>1</sup>H NMR (400 MHz, Chloroform-*d*) δ 7.56 (dd, *J* = 8.3, 1.4 Hz, 2H), 7.38-7.32 (m, 3H), 7.19-7.15 (m, 2H), 7.12-7.07 (m, 4H), 6.63 (d, *J* = 7.0 Hz, 1H), 6.45 (s, 1H), 4.90 (s, 1H), 4.66 (dt, *J* = 15.9, 8.1 Hz, 1H), 4.46 (dt, *J* = 15.8, 5.0 Hz, 1H), 4.37 (s, 1H), 2.37-2.31 (m, 2H), 2.25 (s, 3H). <sup>13</sup>C NMR (101 MHz, Chloroform-*d*) δ 197.13, 187.31, 152.62, 148.51, 140.25, 139.23, 136.33, 133.74, 130.75, 129.42, 129.40, 129.35, 129.29, 128.54, 128.28, 123.26, 120.91, 111.85, 68.98, 67.91, 66.68, 38.60, 21.66. HRMS (ESI): Calcd. for C<sub>27</sub>H<sub>23</sub>N<sub>2</sub>O [M+H]<sup>+</sup>: 391.1810, Found: 391.1809.

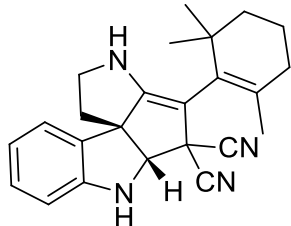

**(8)**: 47 mg, 64% yield, viscous oil.  $^1\text{H}$  NMR (400 MHz, Chloroform-*d*)  $\delta$  7.20 (m, 2H), 6.86 (td,  $J = 7.5, 1.0$  Hz, 1H), 6.82 (dd,  $J = 8.1, 1.0$  Hz, 1H), 4.79 (s, 1H), 4.65 (s, 1H), 3.91 (td,  $J = 10.5, 5.8$  Hz, 2H), 3.81-3.74 (m, 1H), 2.26-2.17 (m, 1H), 2.12 (m, 1H), 2.08 – 2.01 (m, 2H), 1.79-1.69 (m, 1H), 1.66 (s, 3H), 1.65-1.61 (m, 1H), 1.53 (m, 1H), 1.41 (dd,  $J = 12.2, 3.2$  Hz, 1H), 1.12 (s, 3H), 0.89 (s, 3H).  $^{13}\text{C}$  NMR (101 MHz, Chloroform-*d*)  $\delta$  159.07, 147.60, 135.87, 131.89, 129.78, 129.56, 122.51, 120.76, 115.79, 114.58, 110.62, 92.01, 77.68, 63.78, 57.03, 48.89, 39.88, 37.87, 34.94, 32.33, 29.48, 28.72, 21.40, 18.86. HRMS (ESI): Calcd. for  $\text{C}_{24}\text{H}_{27}\text{N}_4$   $[\text{M}+\text{H}]^+$ : 371.2236, Found: 371.2239.



## 4. $^1\text{H}$ NMR and $^{13}\text{C}$ NMR Spectra of All Compounds

### Compound 3a

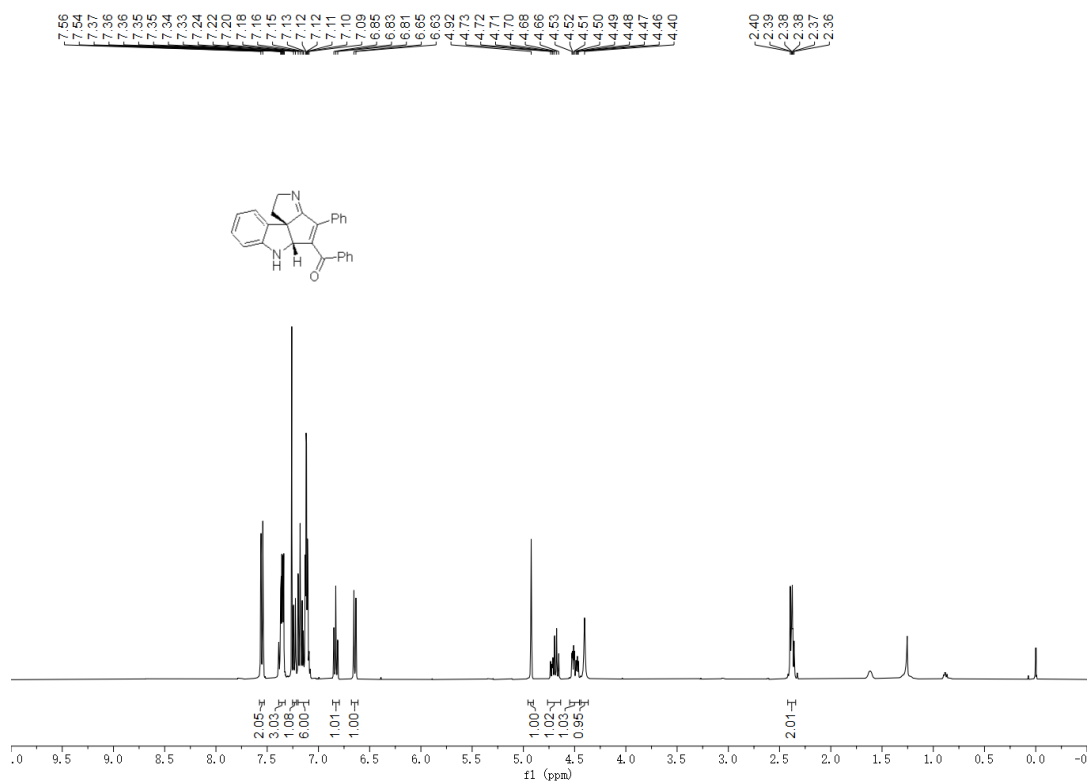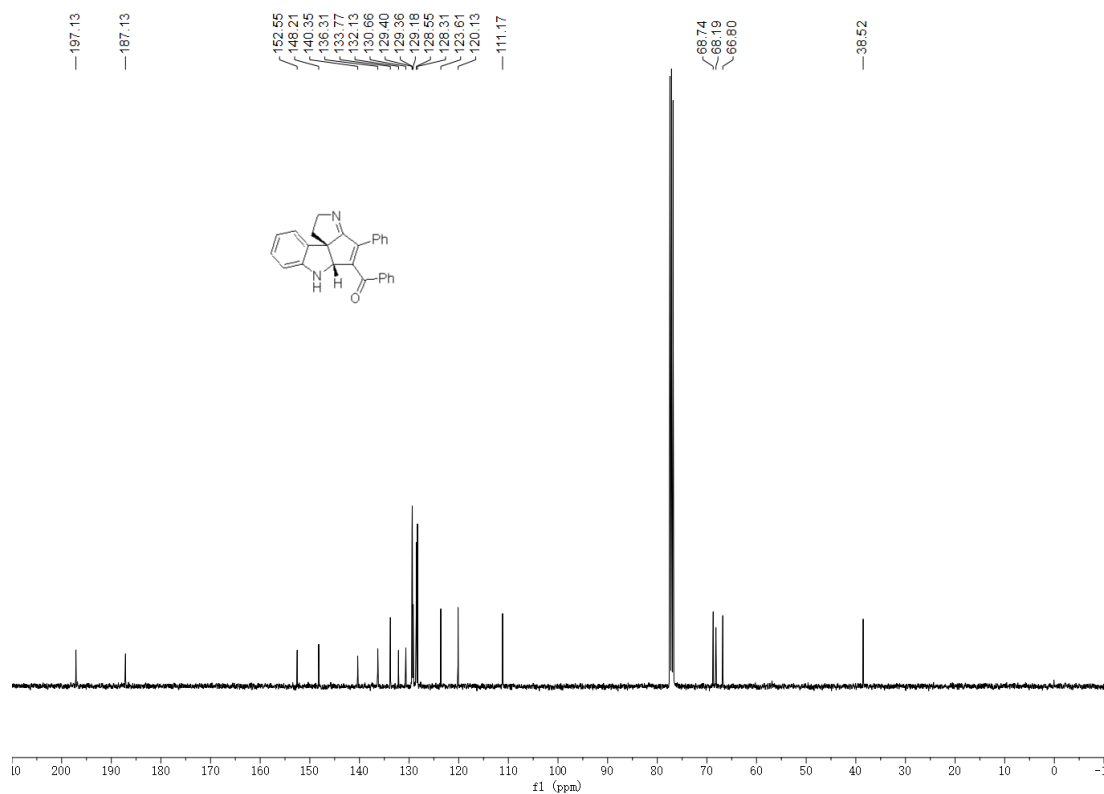

# Compound 3b

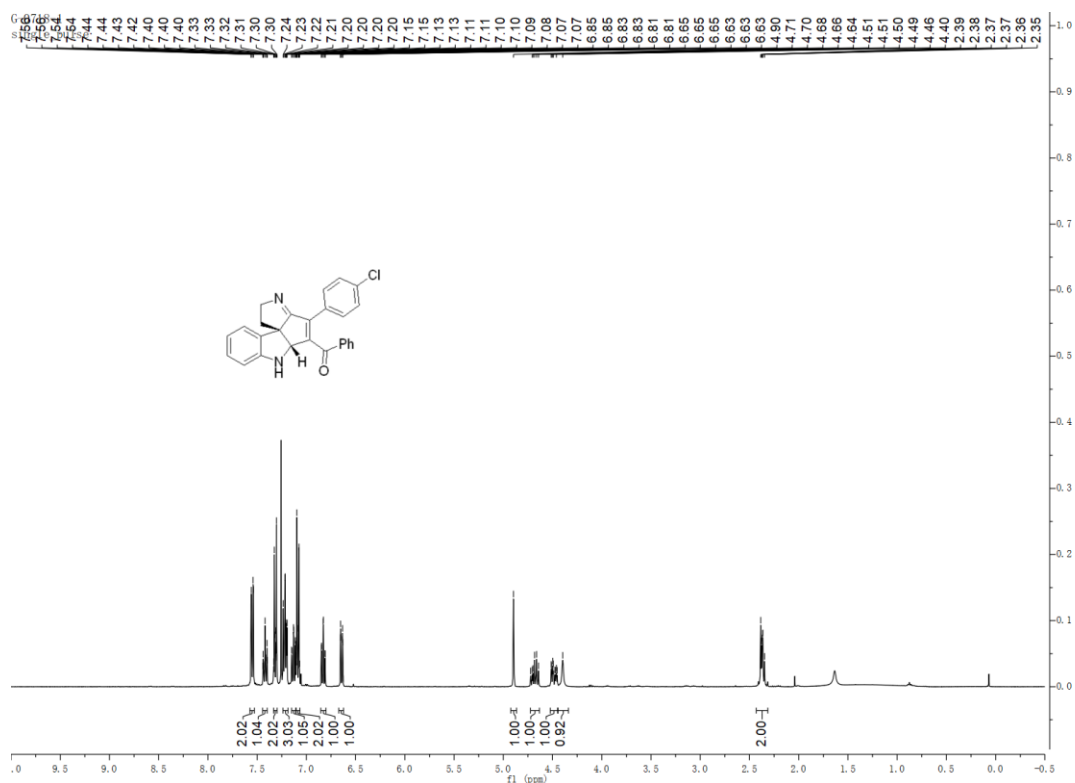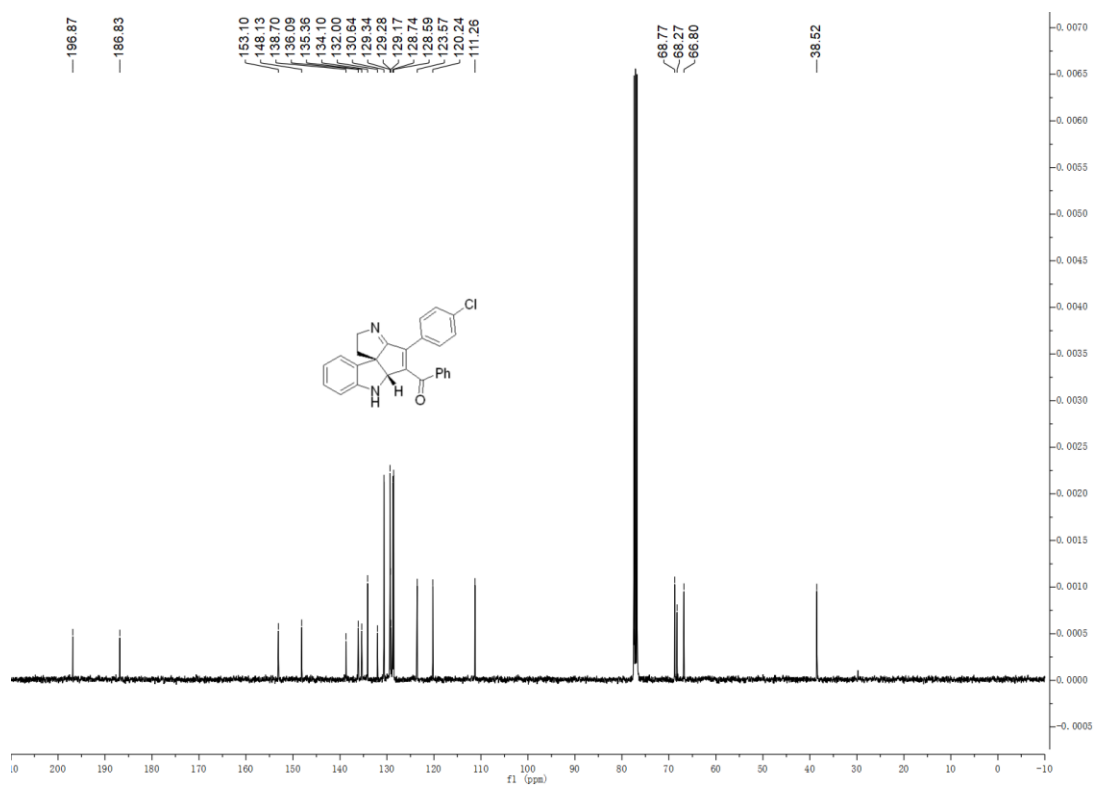

# Compound 3c

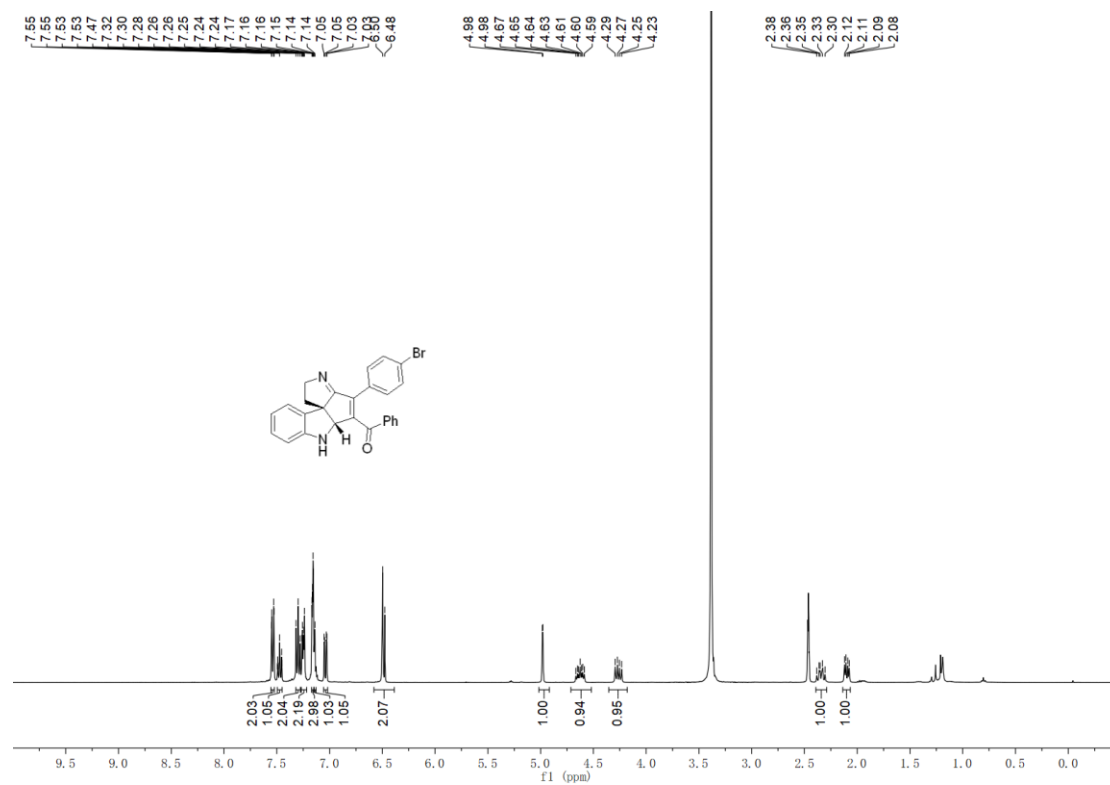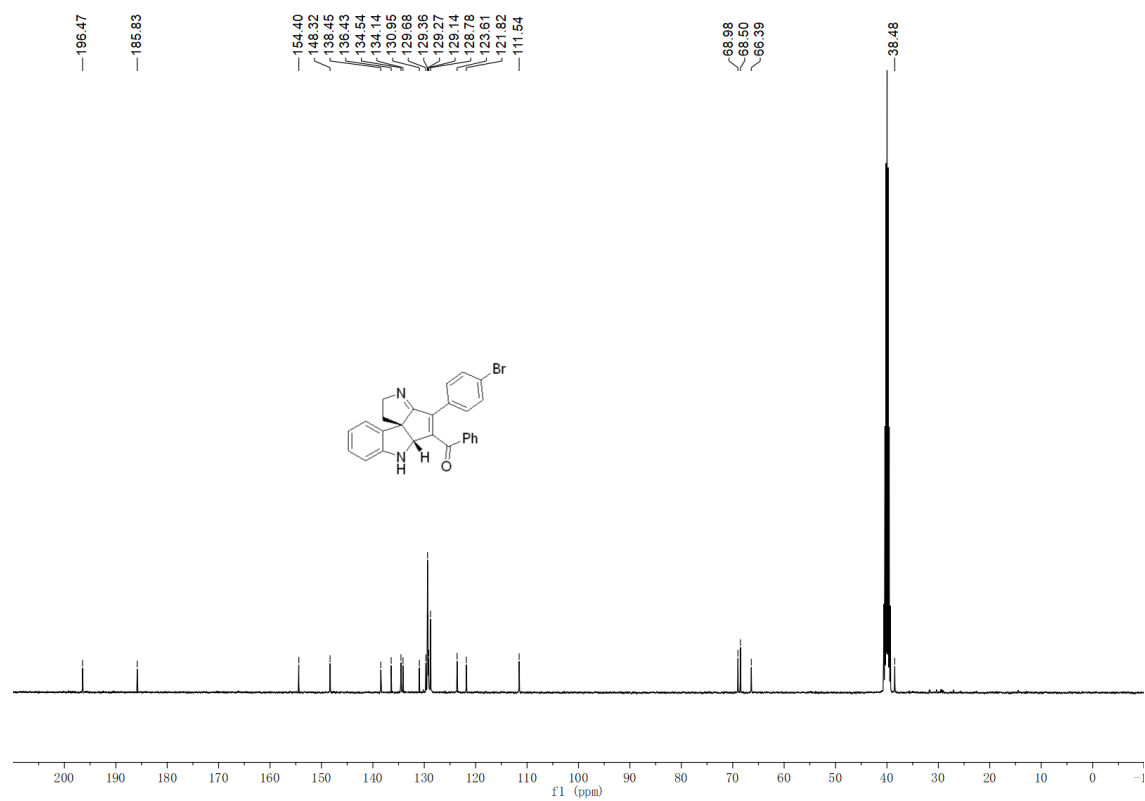

[illegible]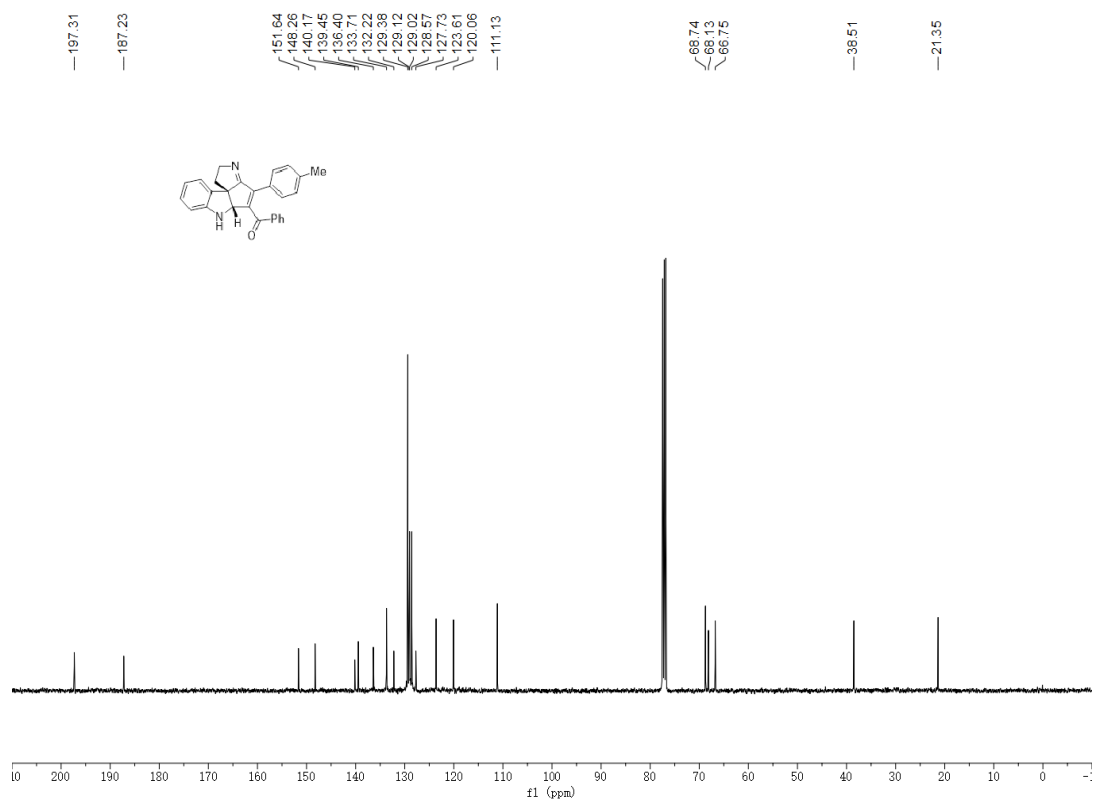

# Compound 3e

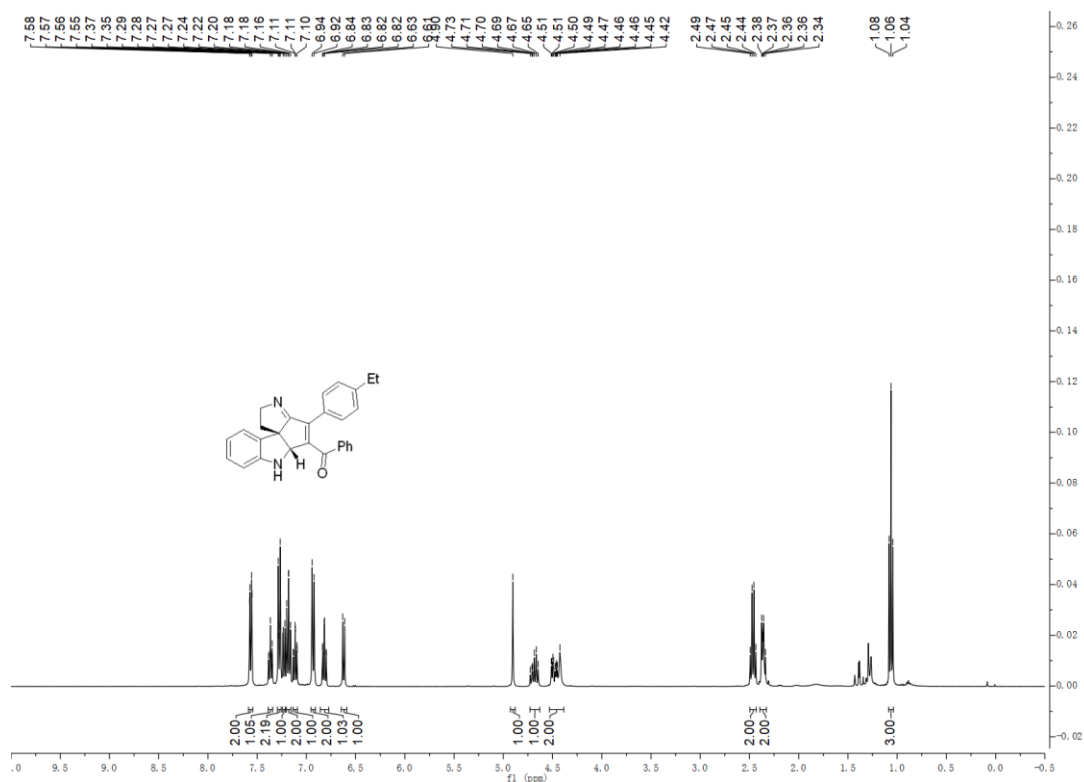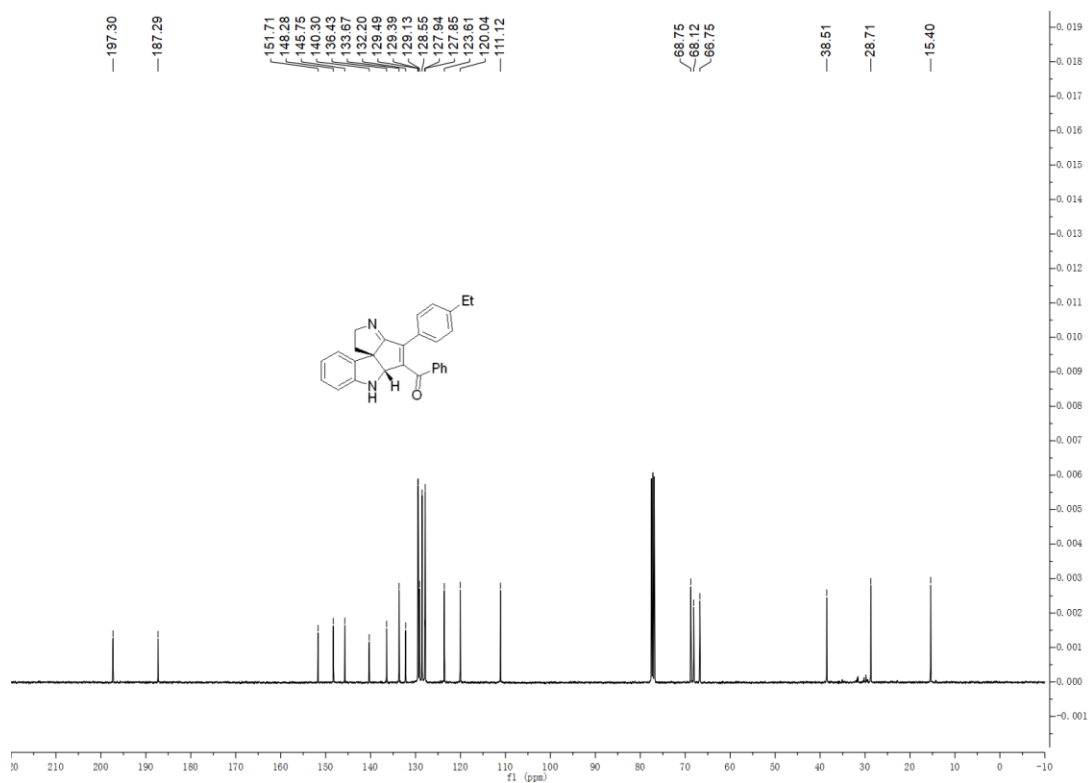

# Compound 3f

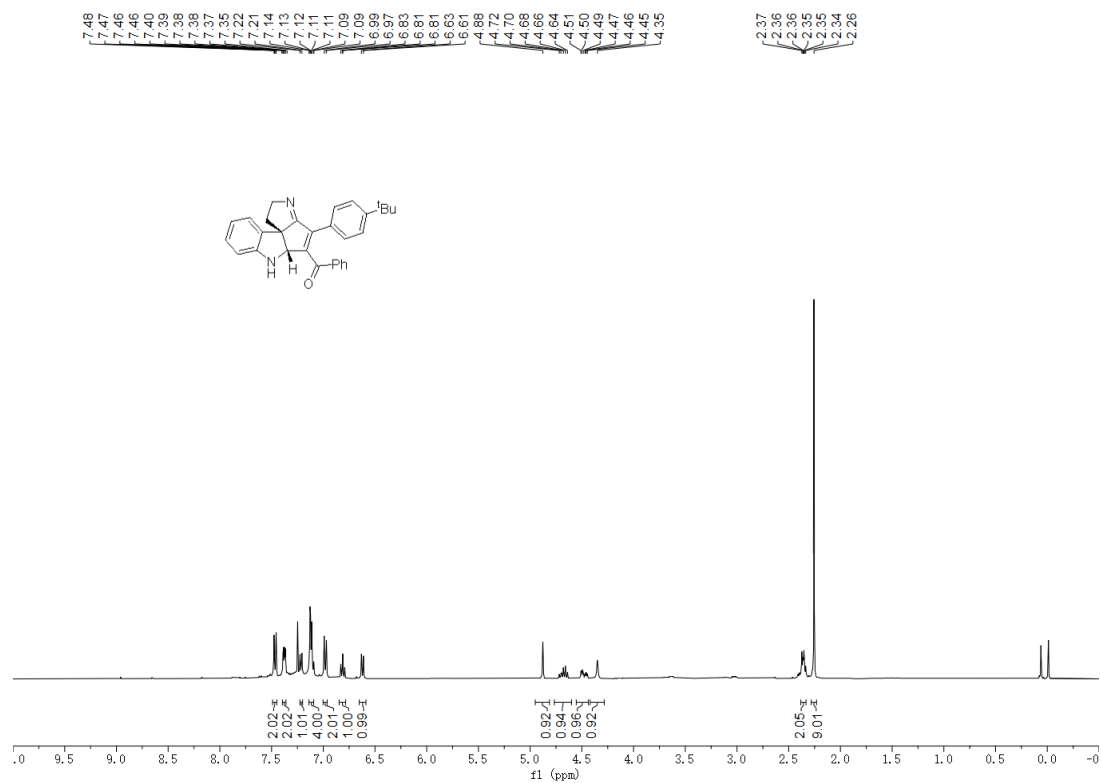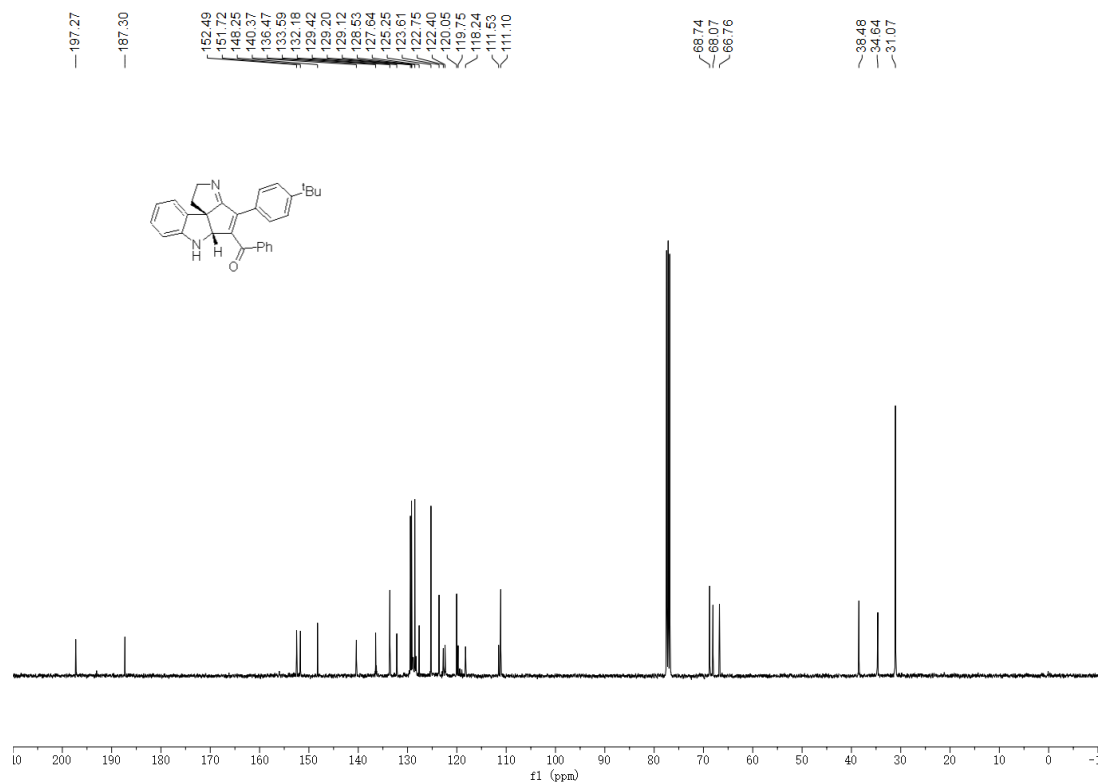

# Compound 3g

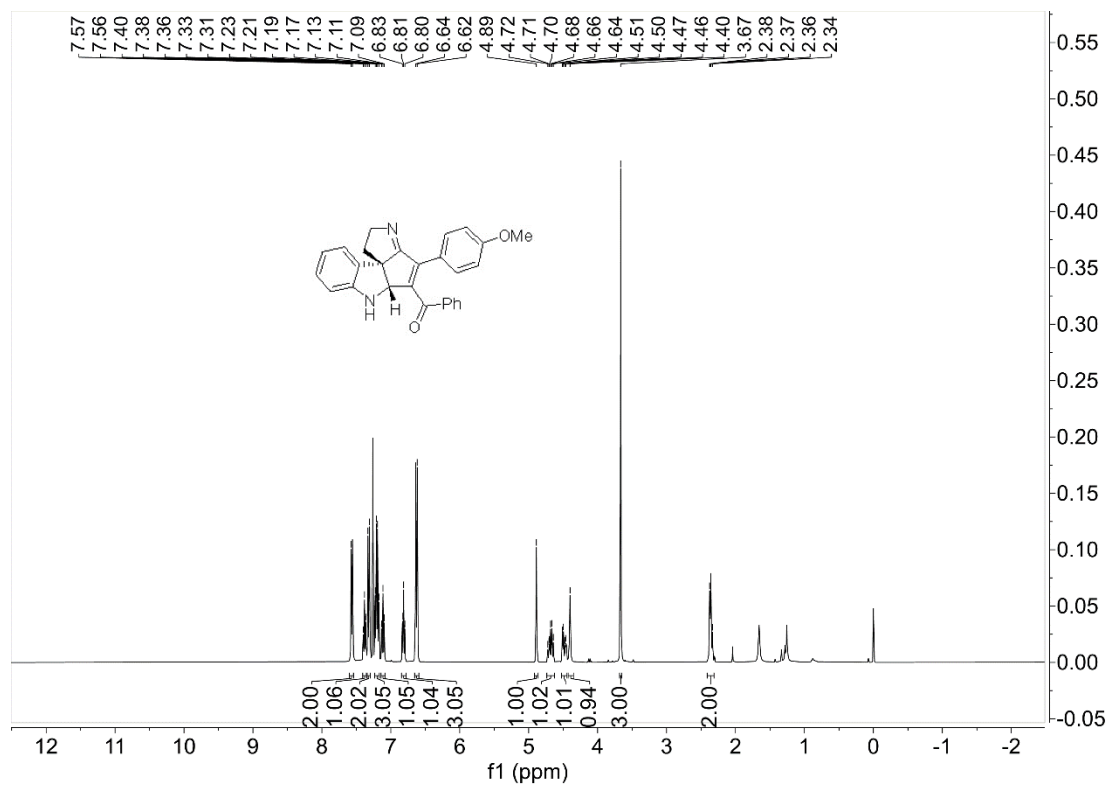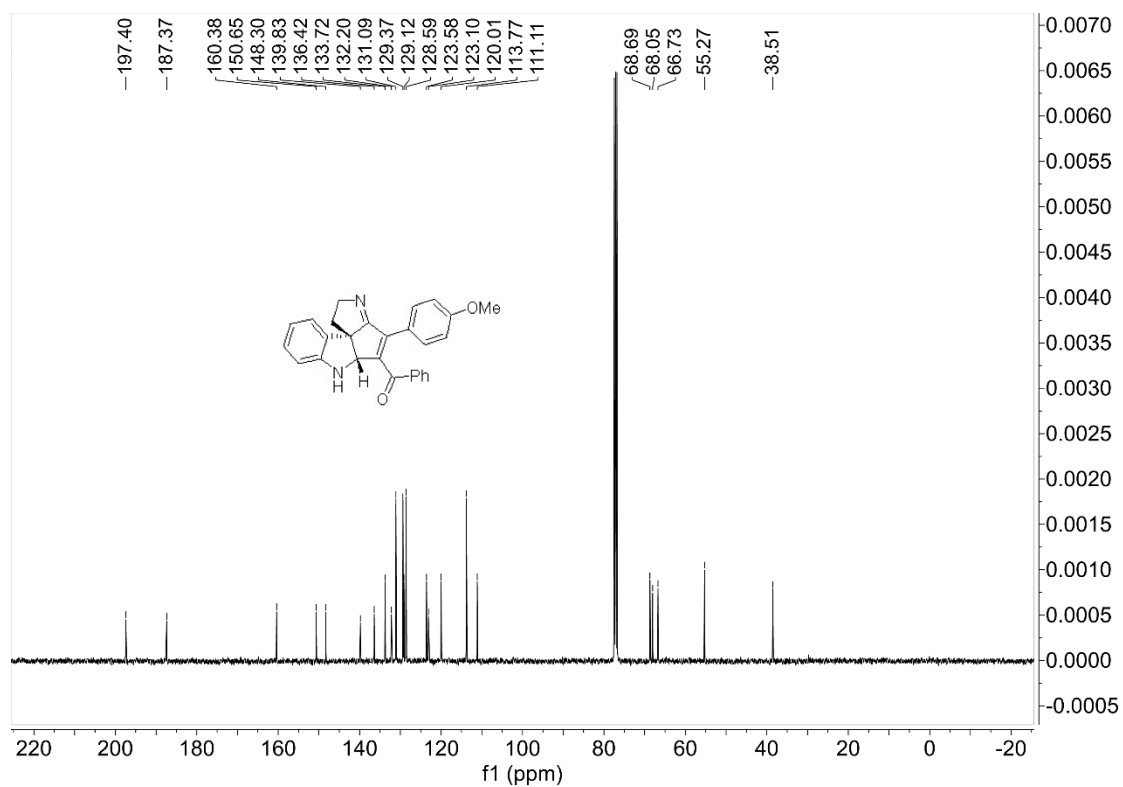

# Compound 3h

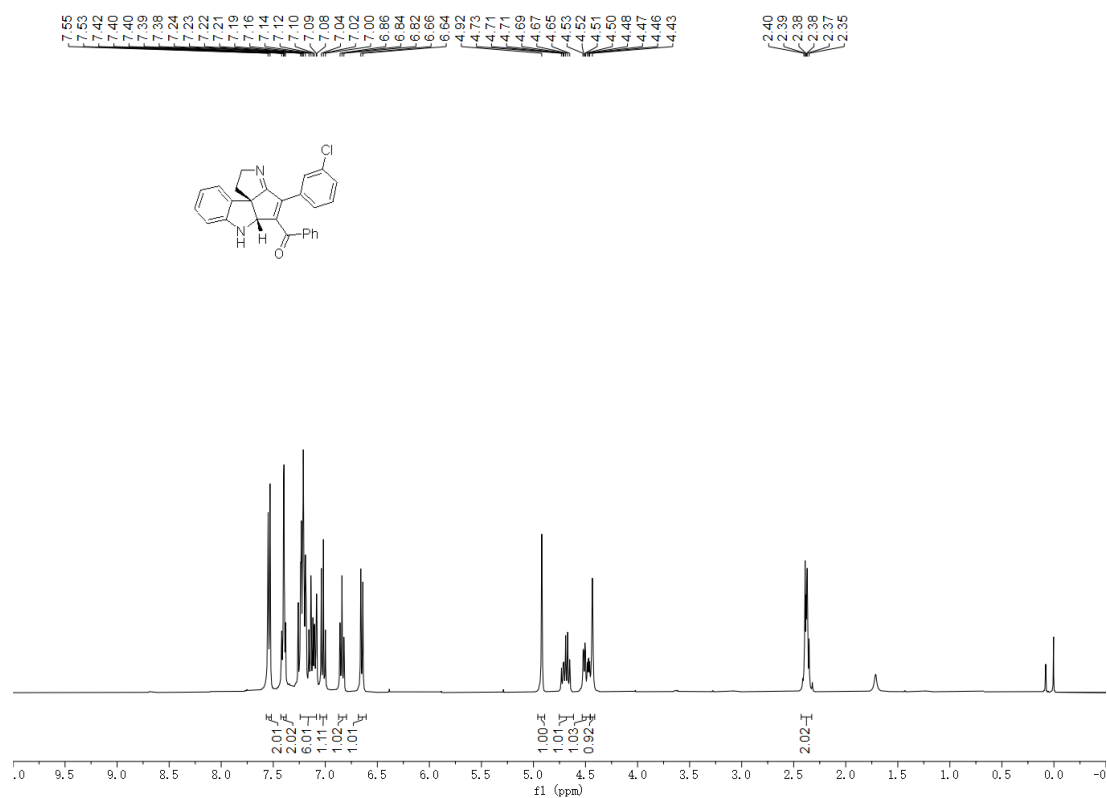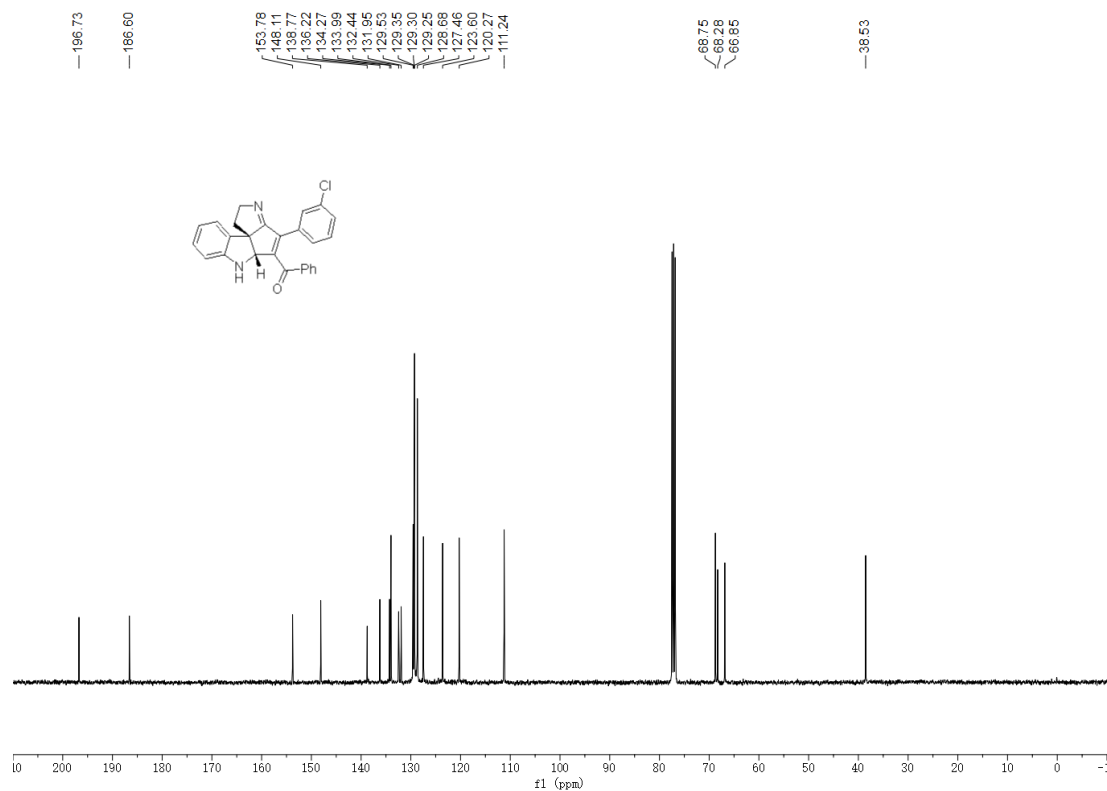



# Compound 3i

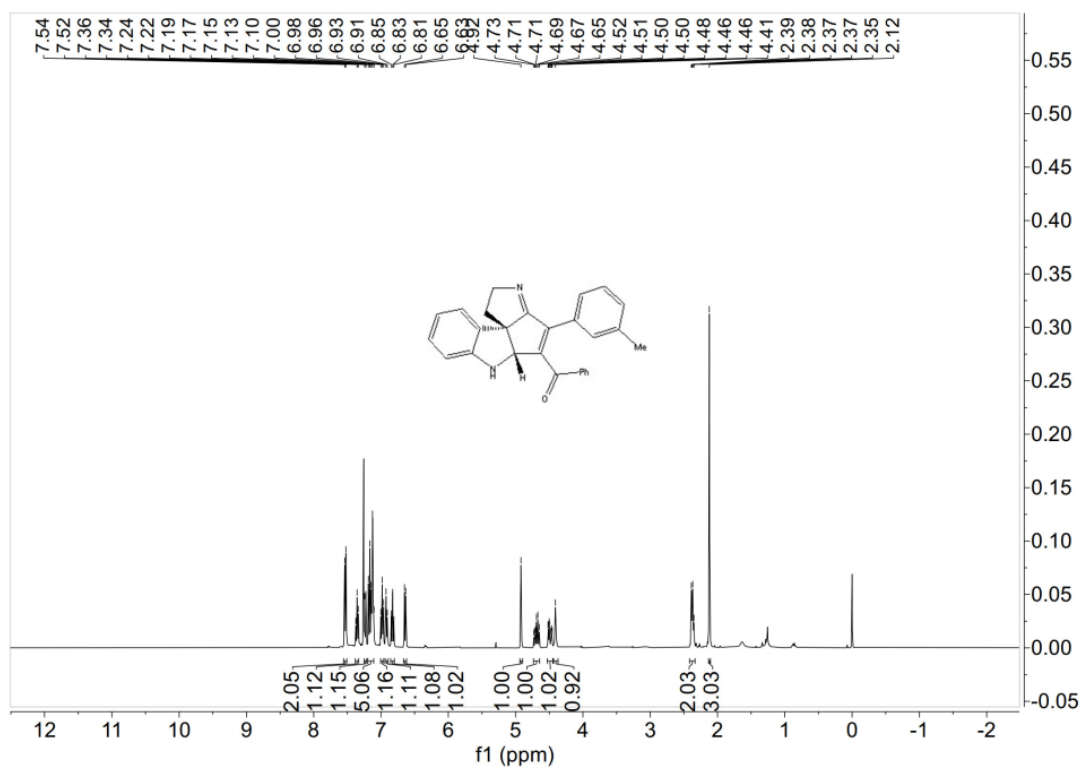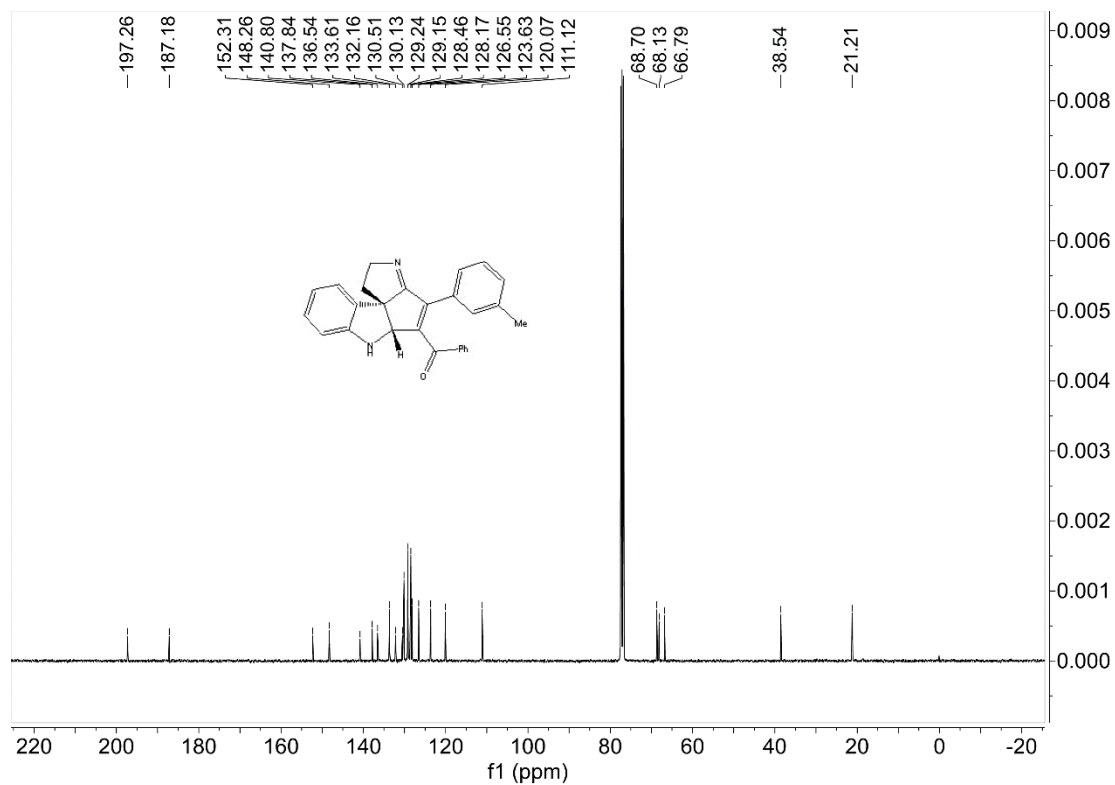

# Compound 3j

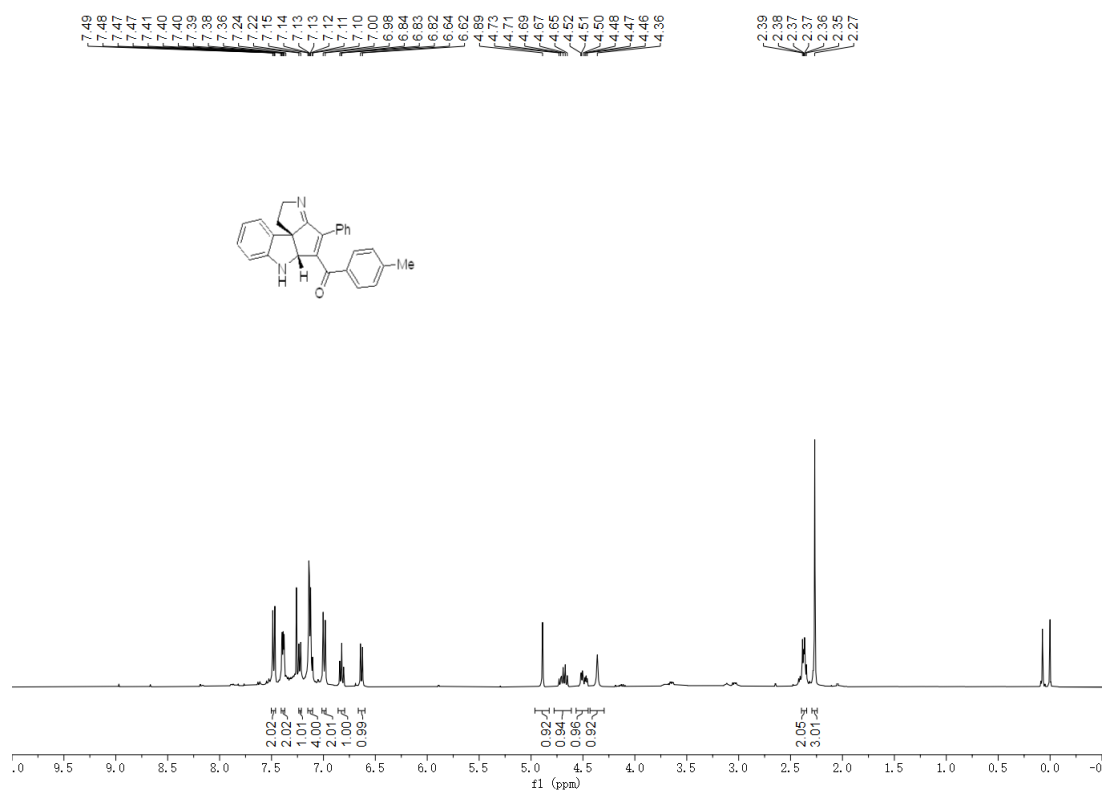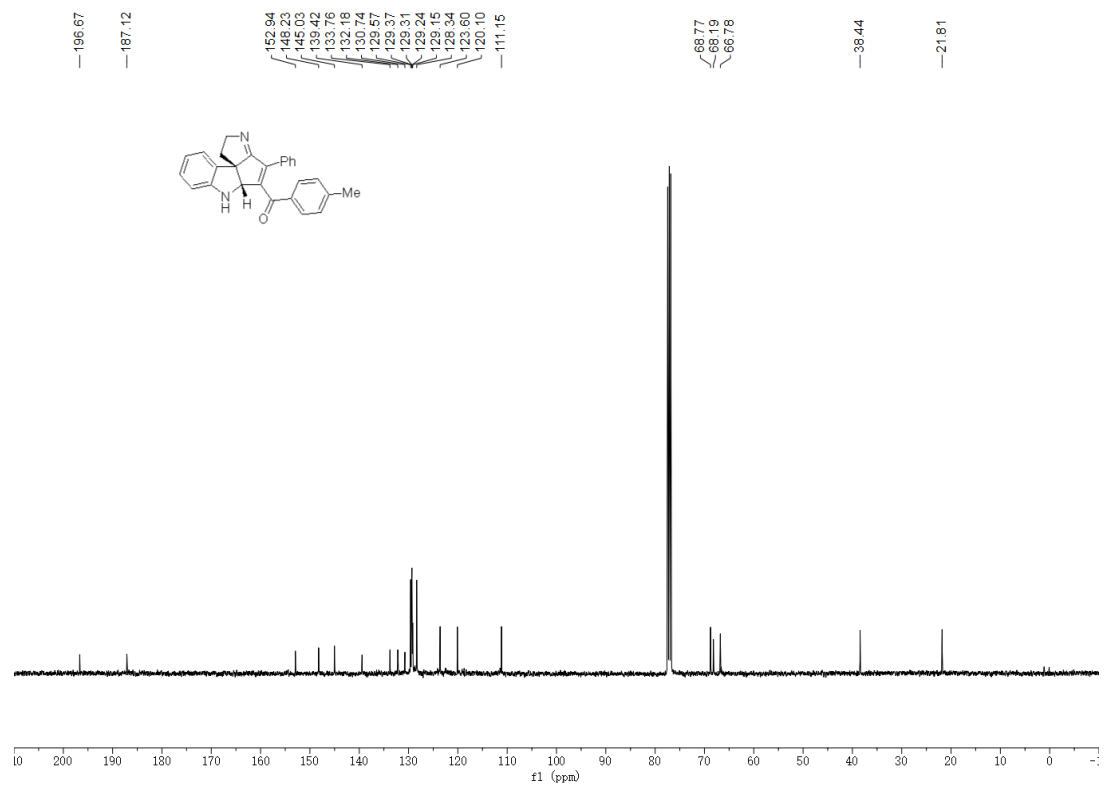

# Compound 3k

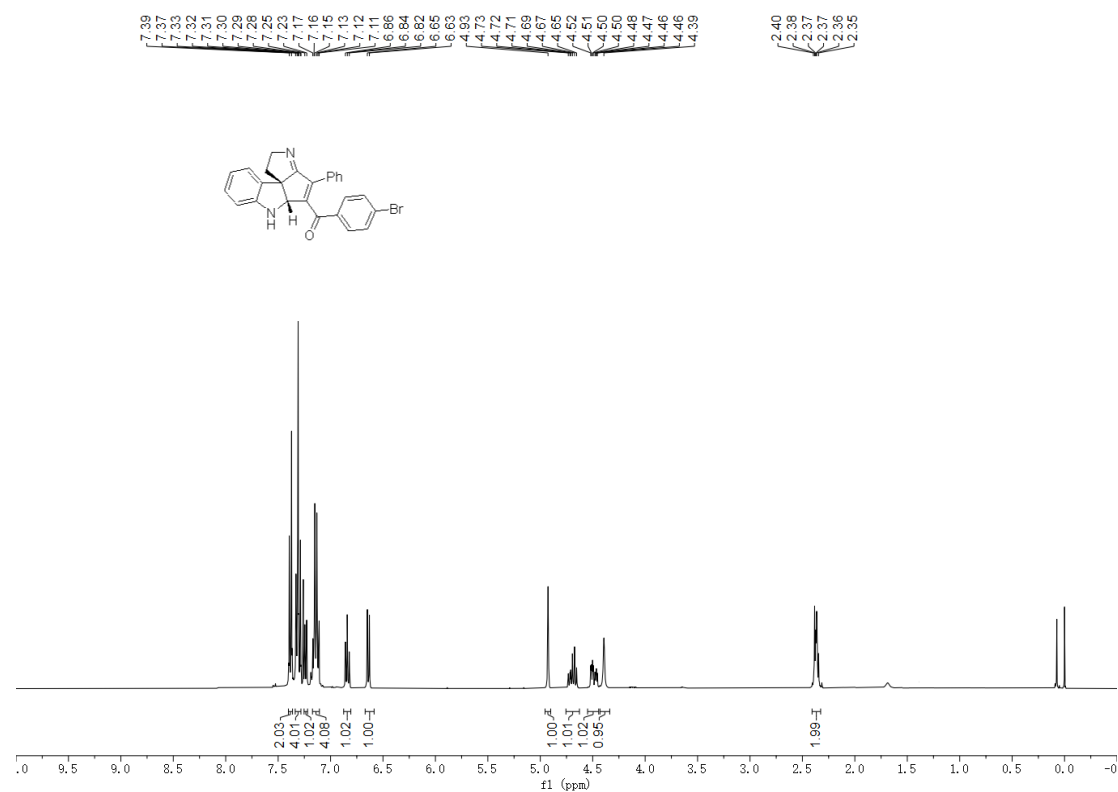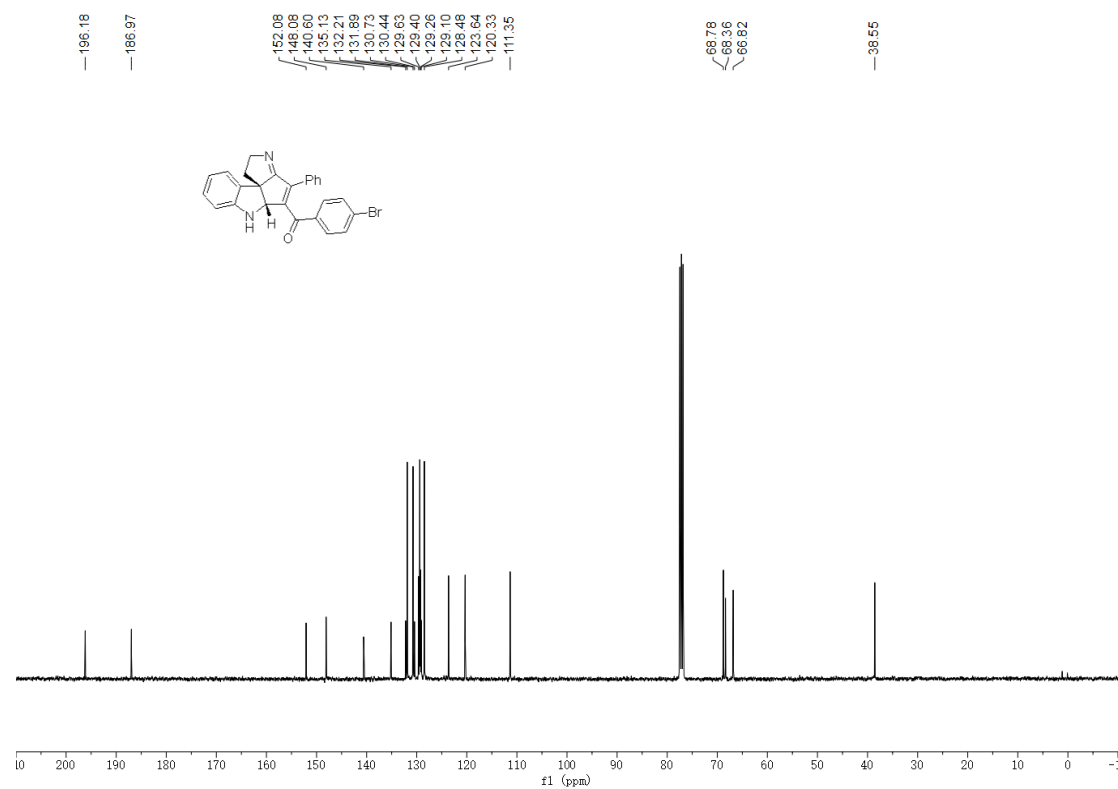

# Compound 3l

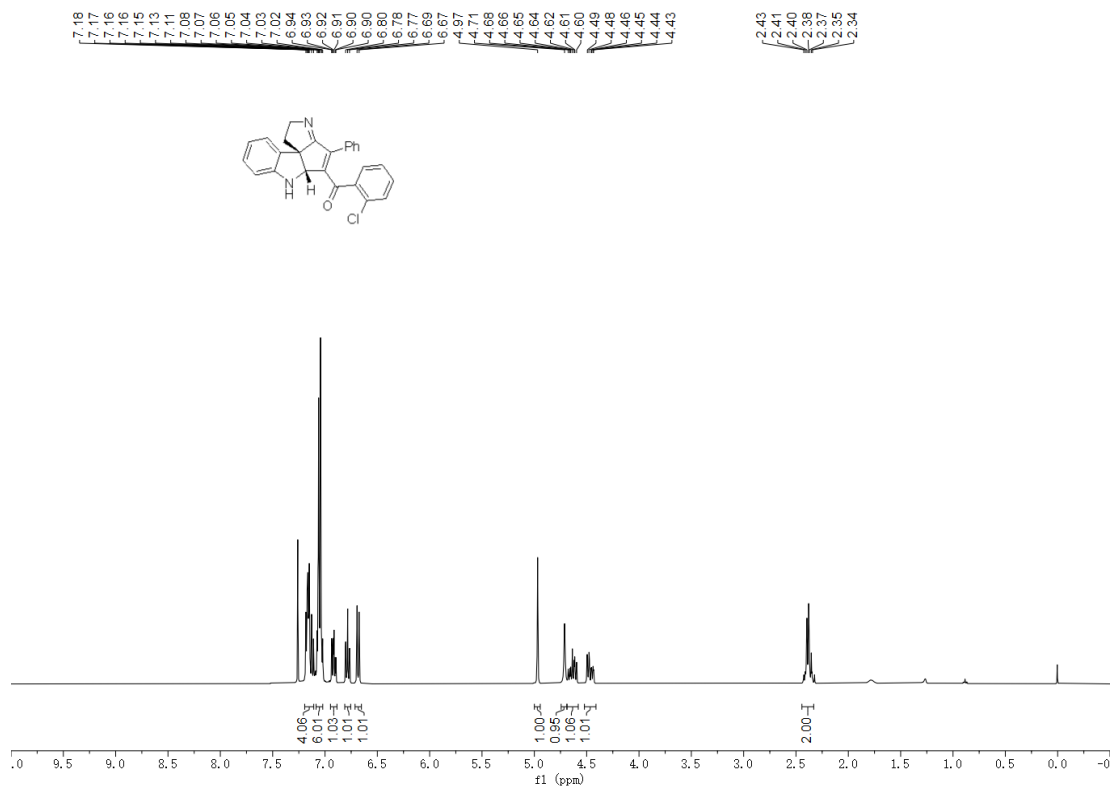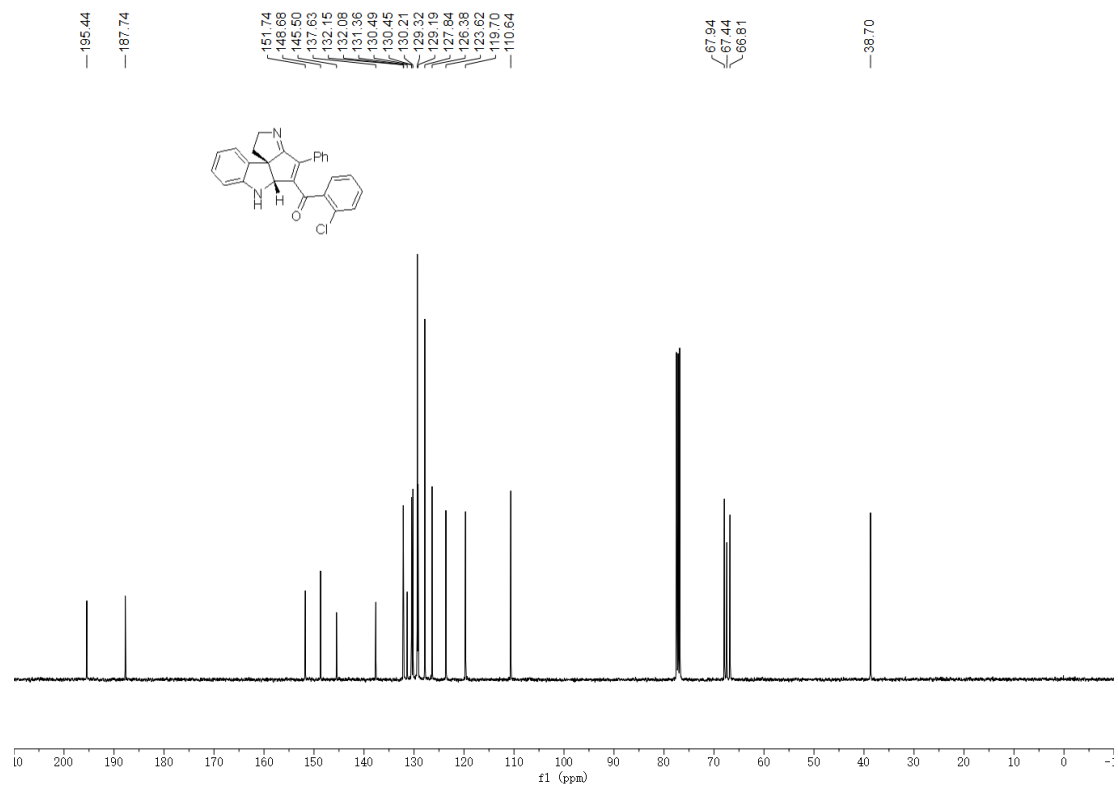

# Compound 3m

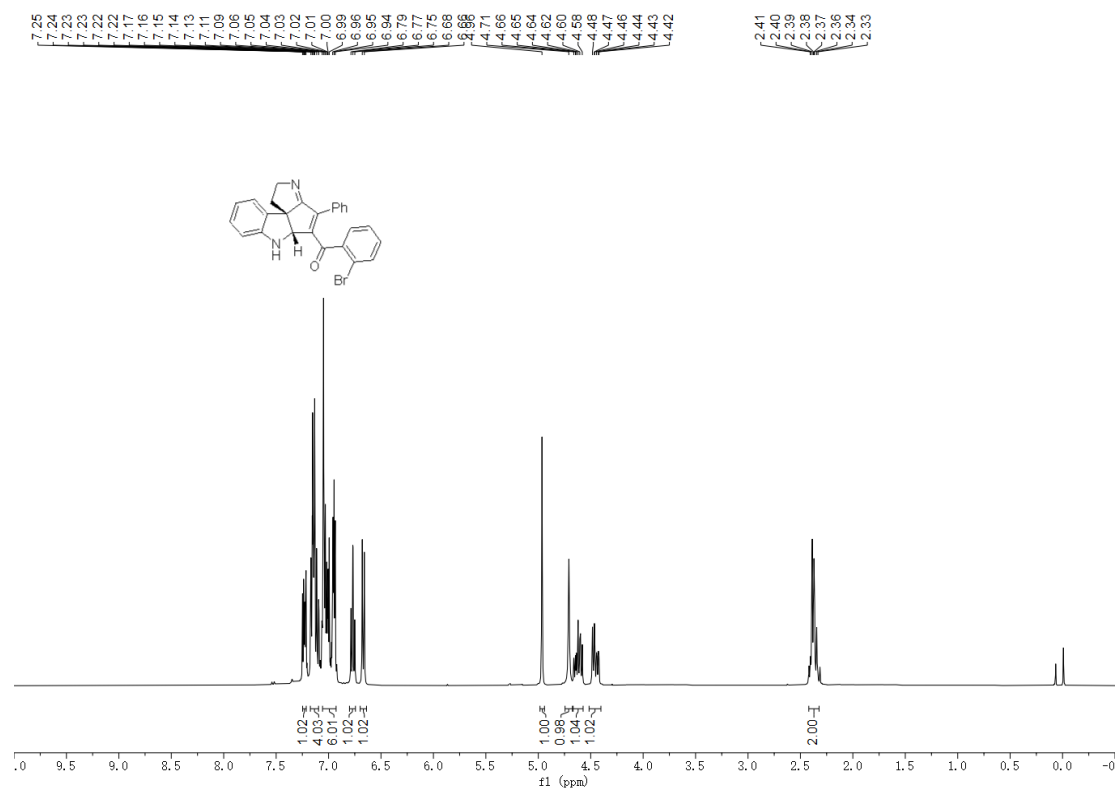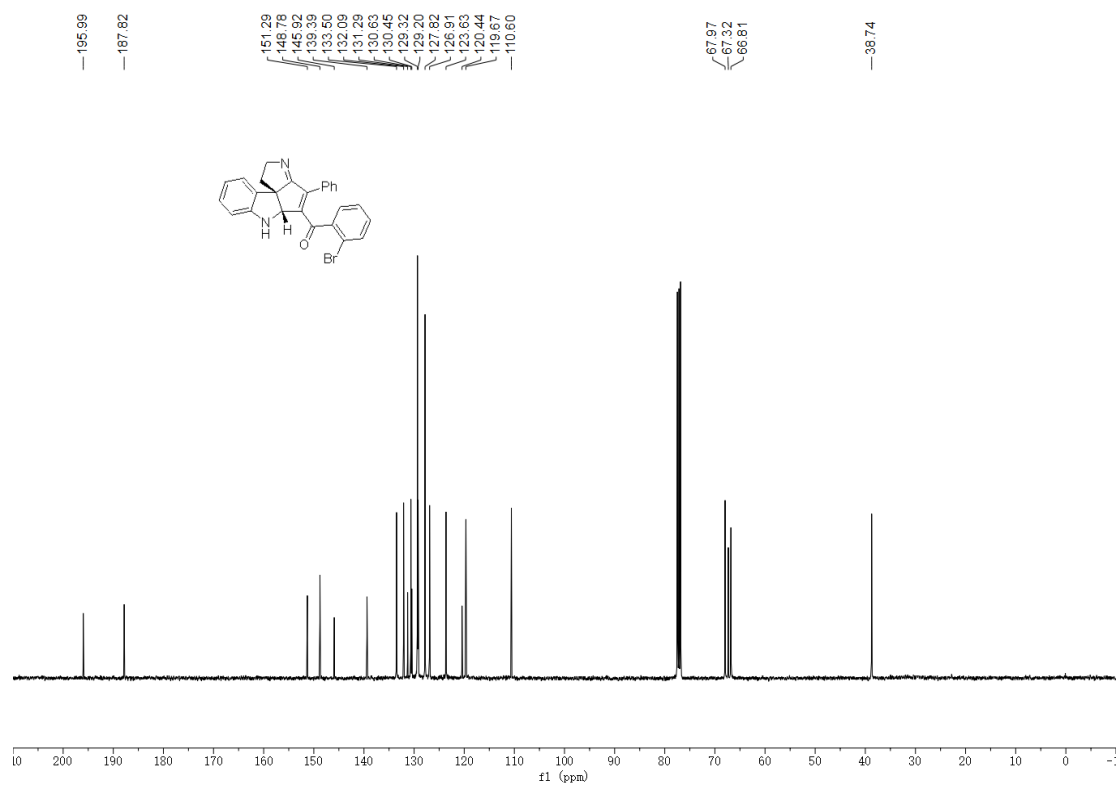

# Compound 3n

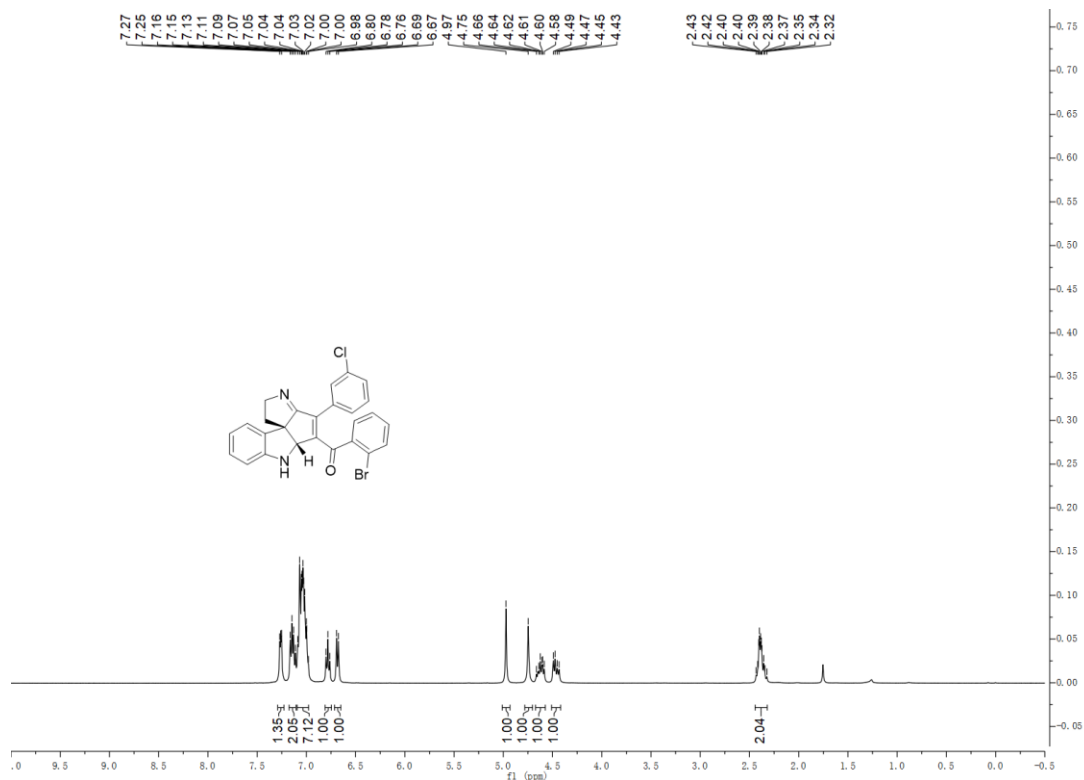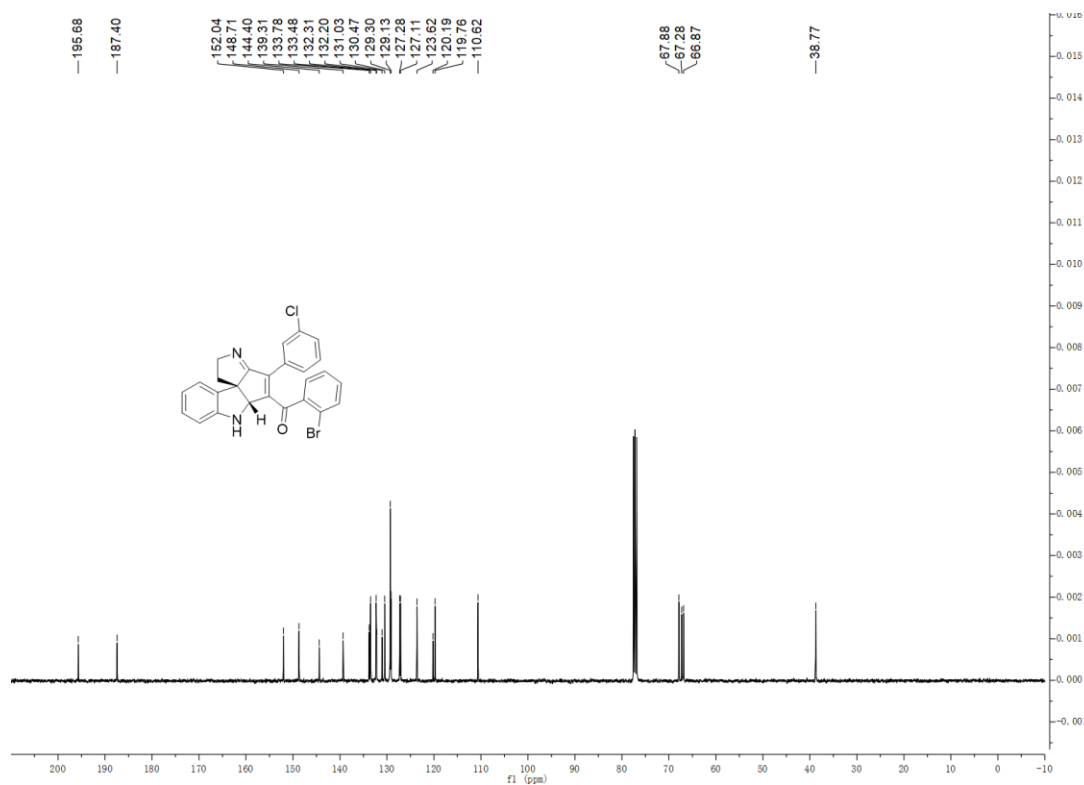

# Compound 3o

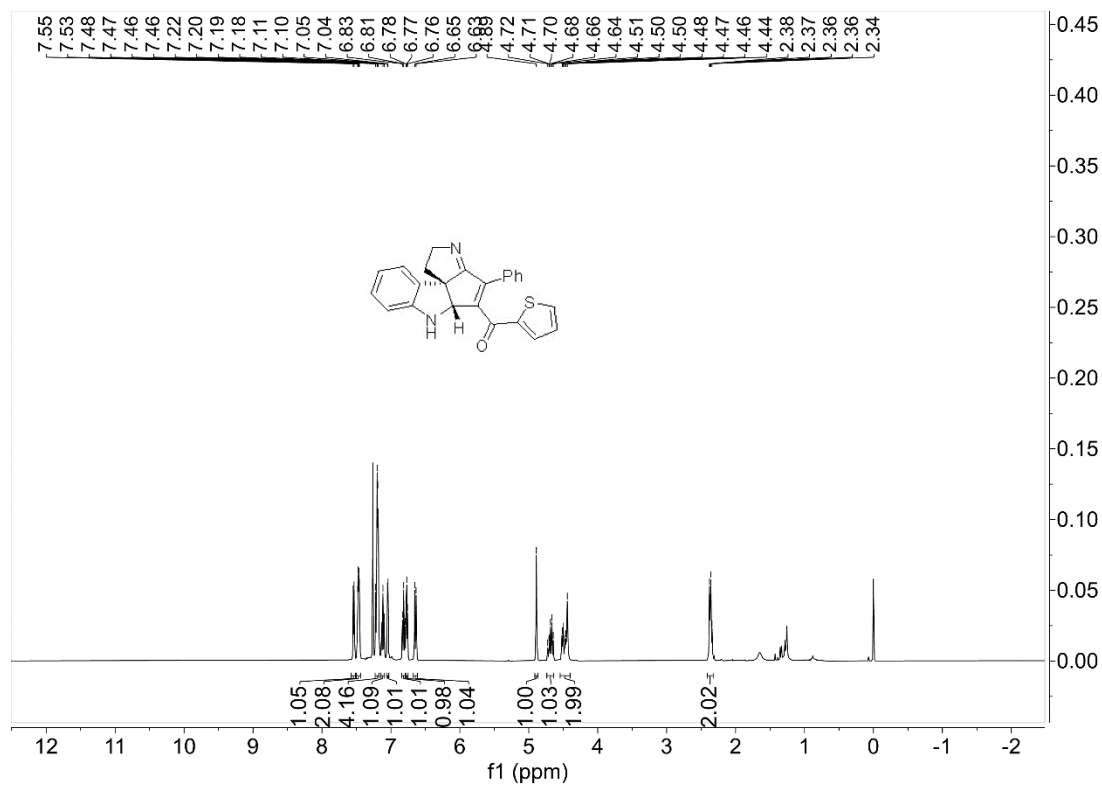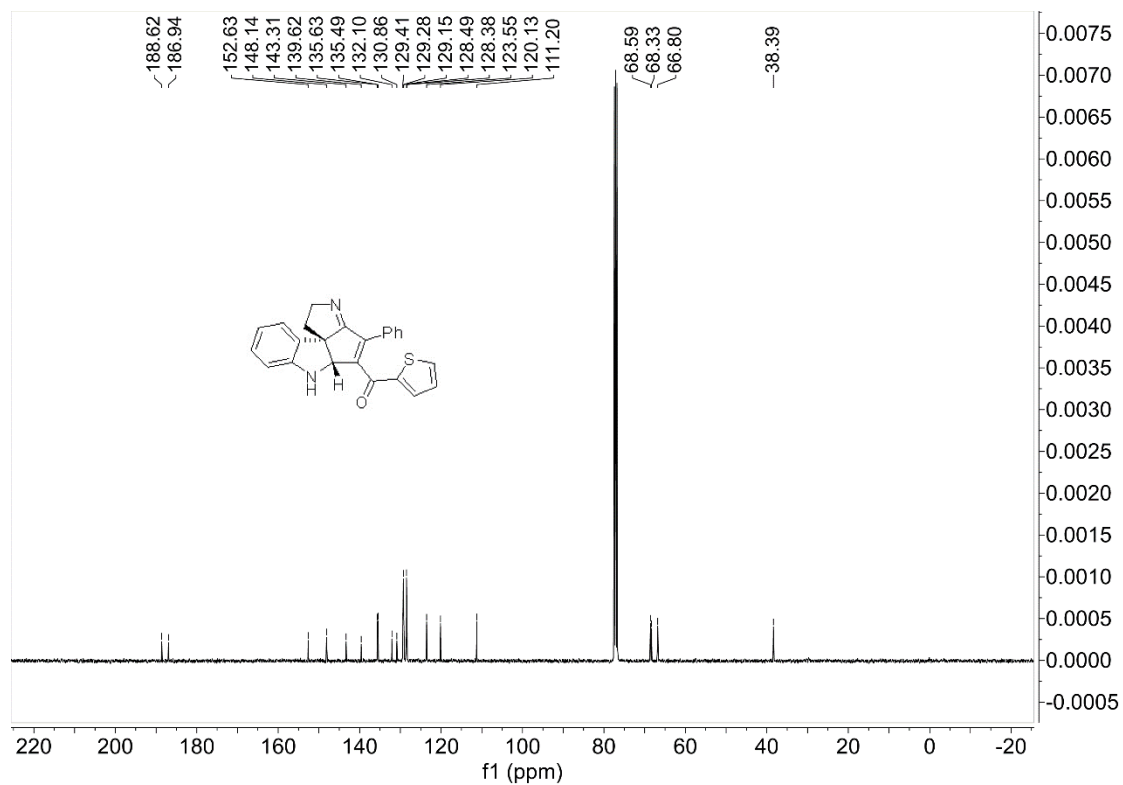

# Compound 3p

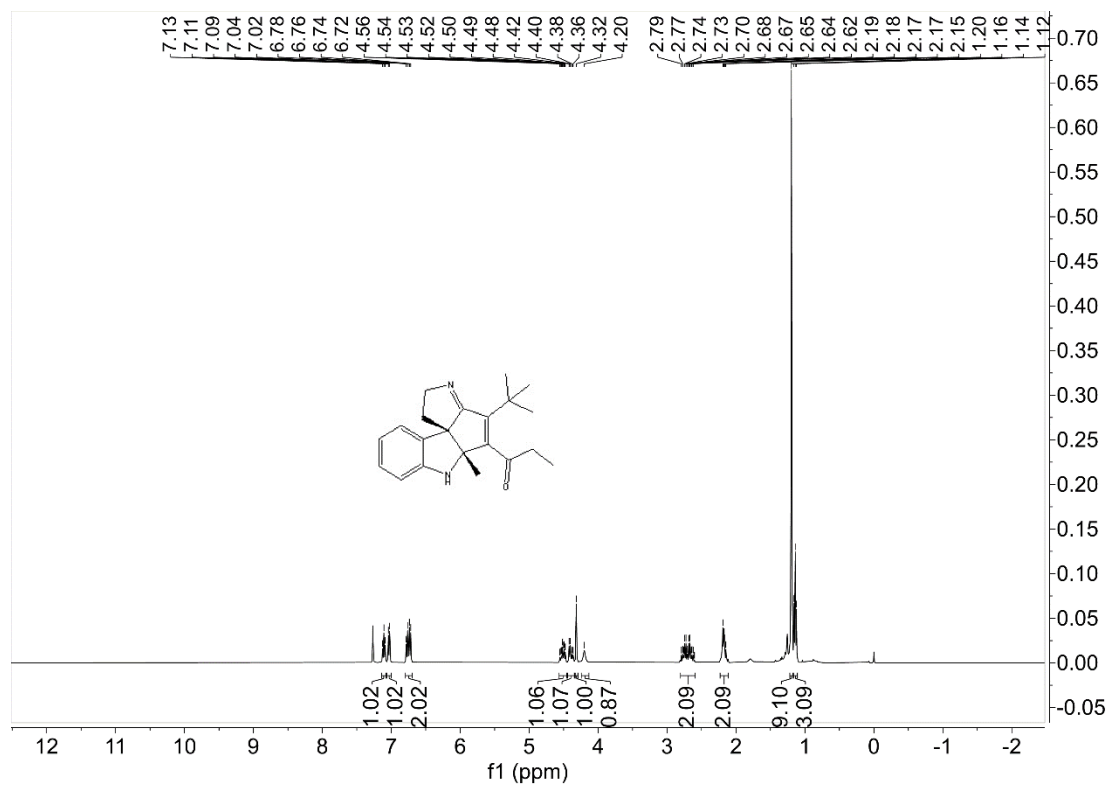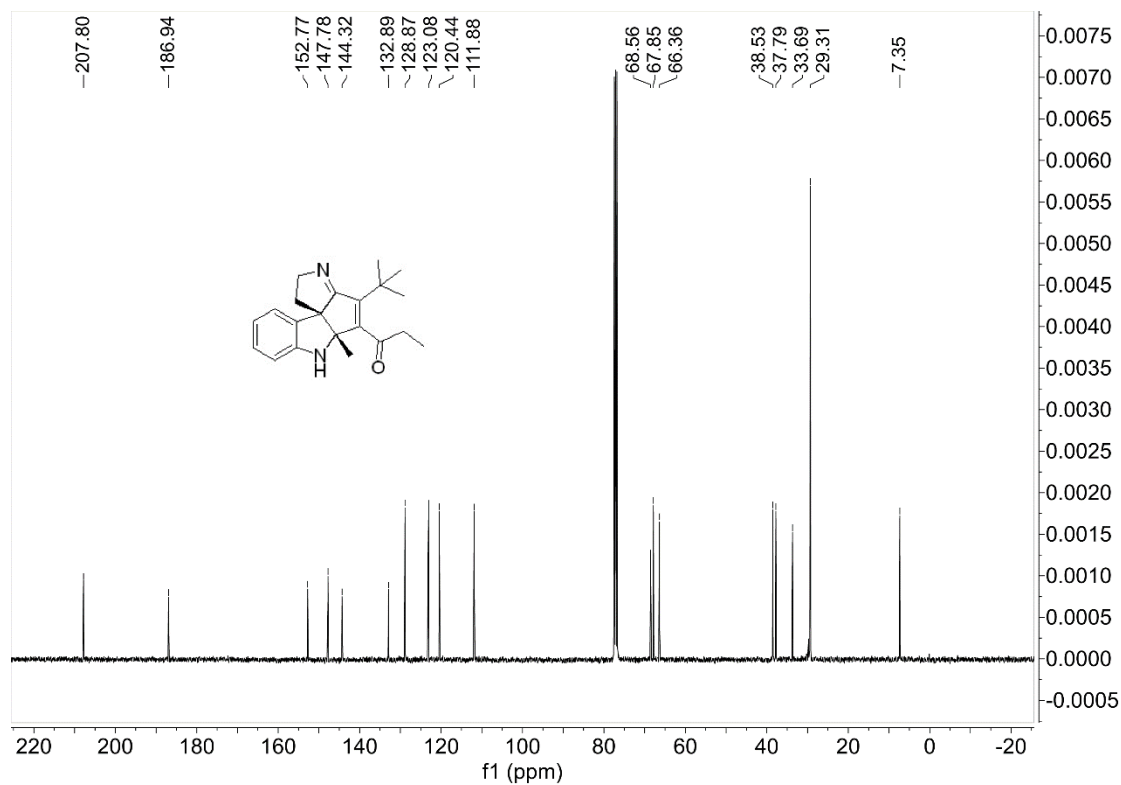



# Compound 4a

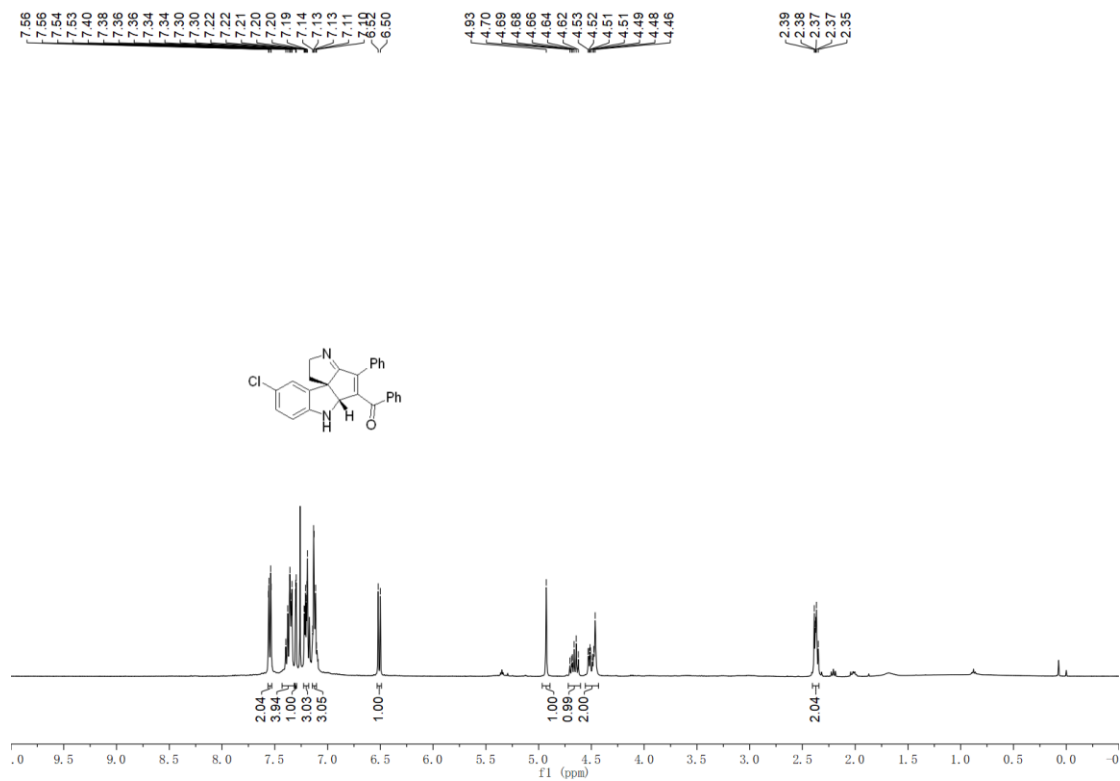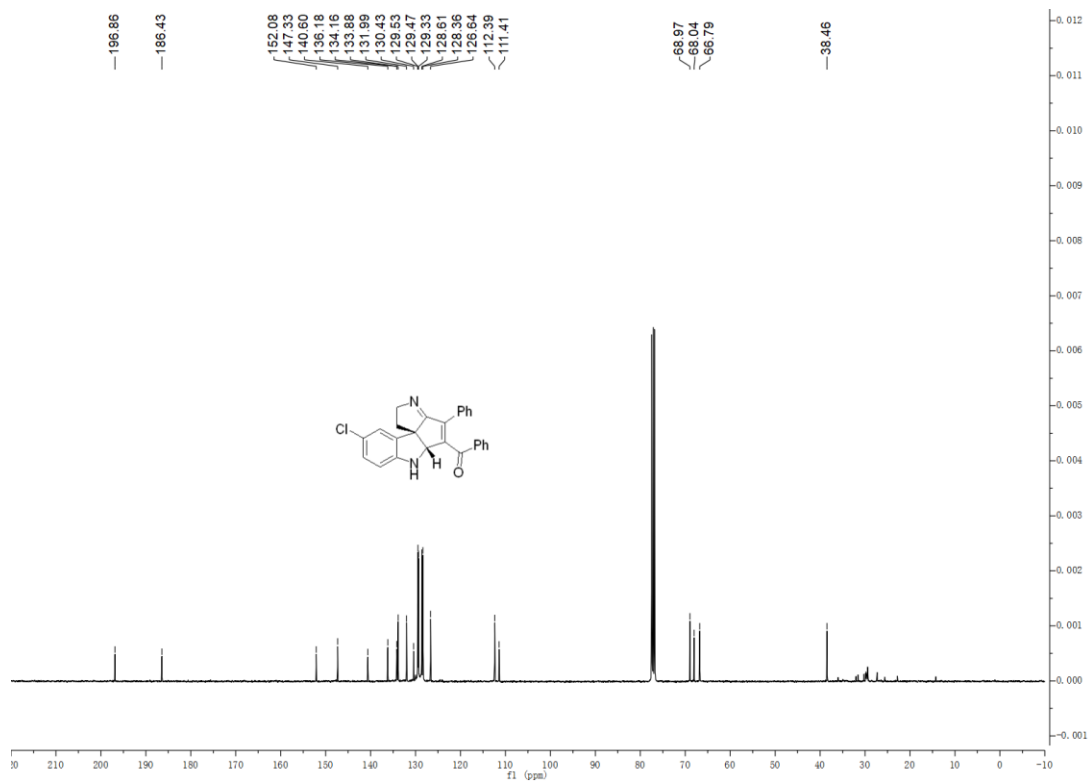

# Compound 4b

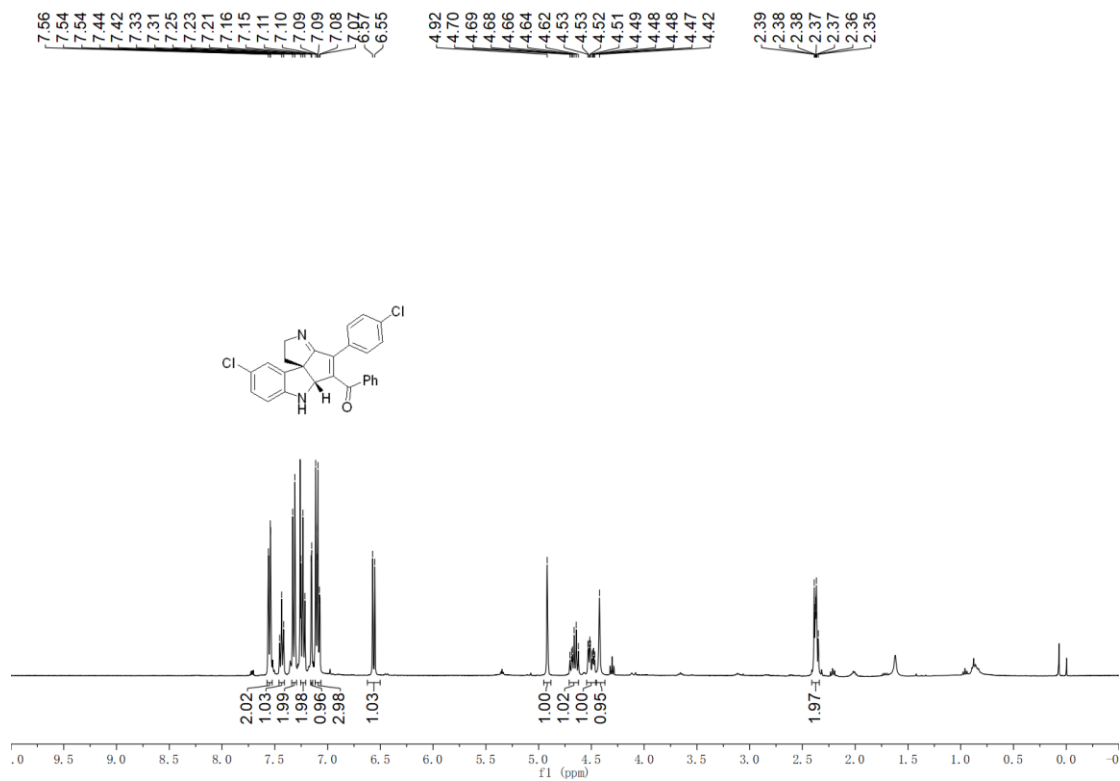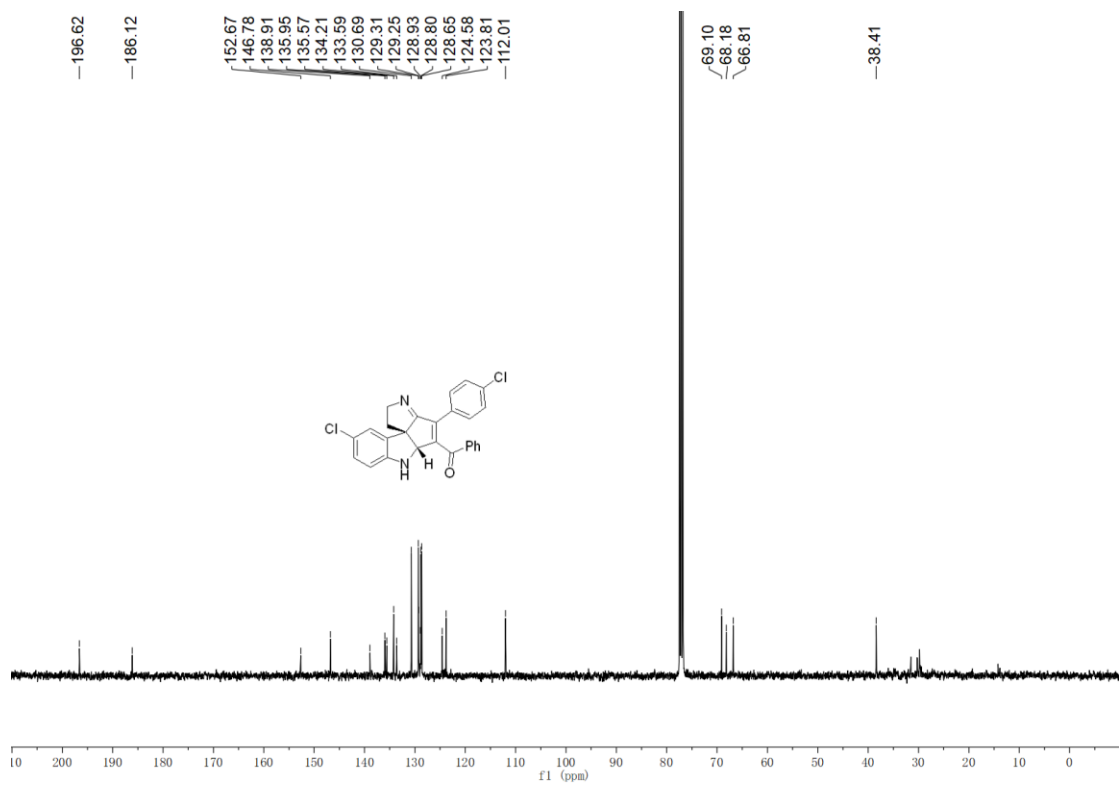

# Compound 4c

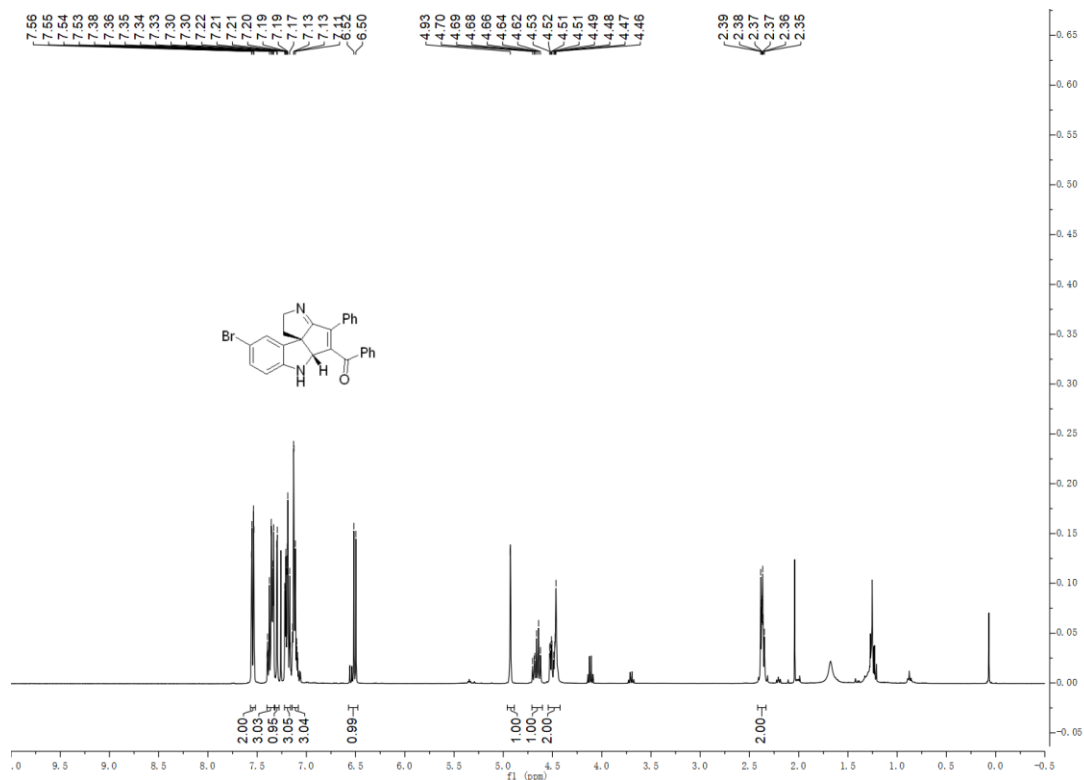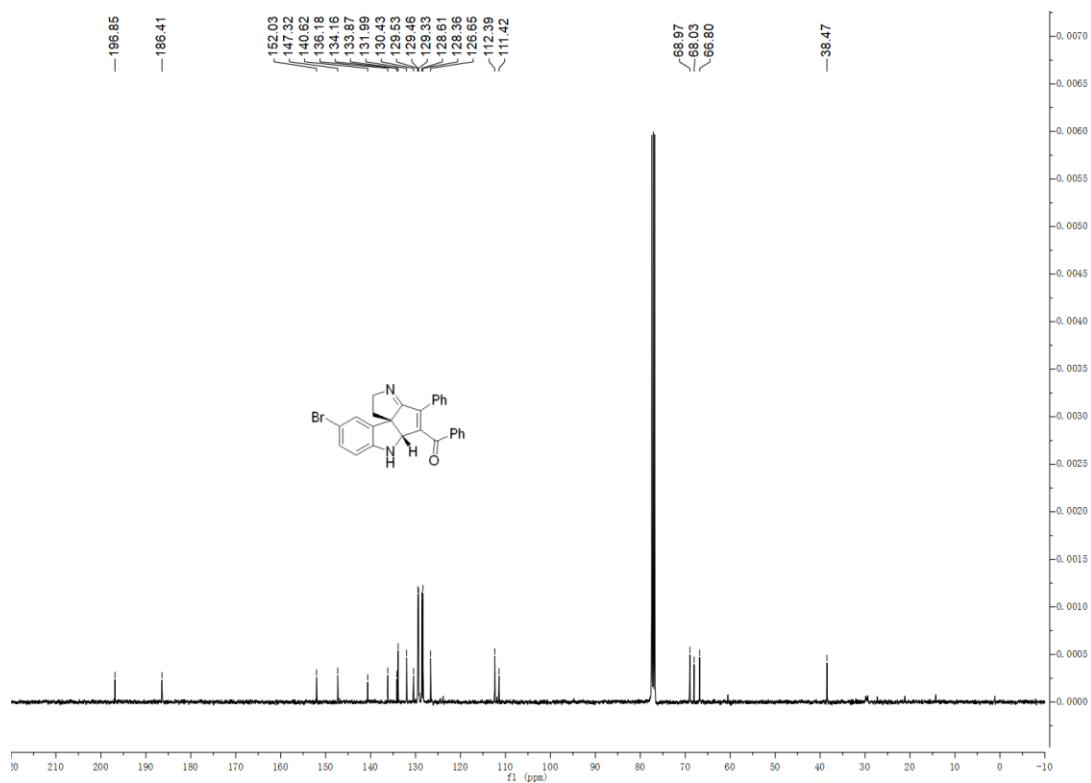

# Compound 4d

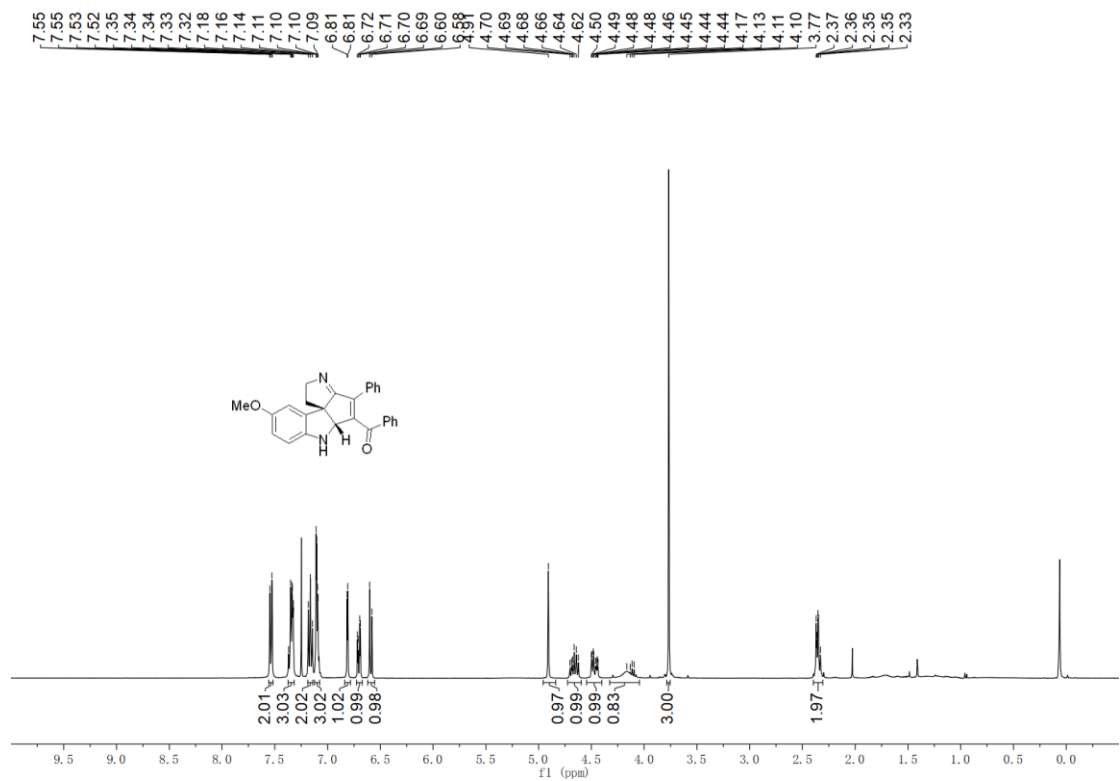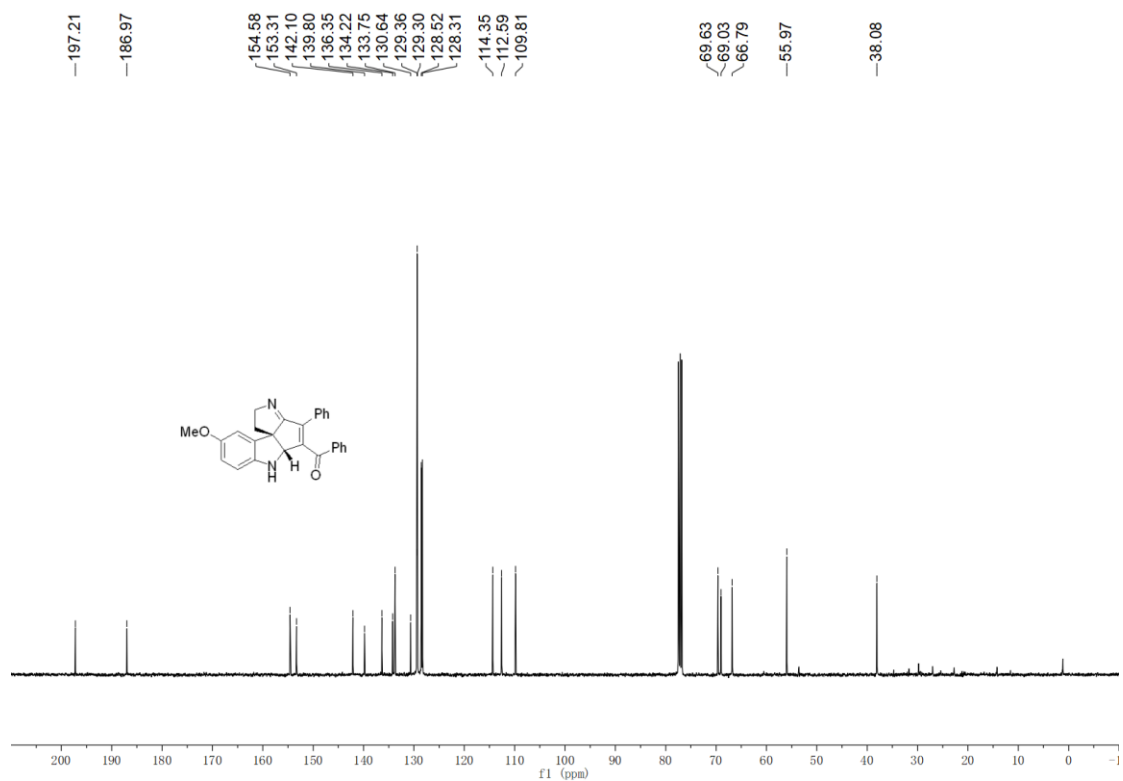

# Compound 4e

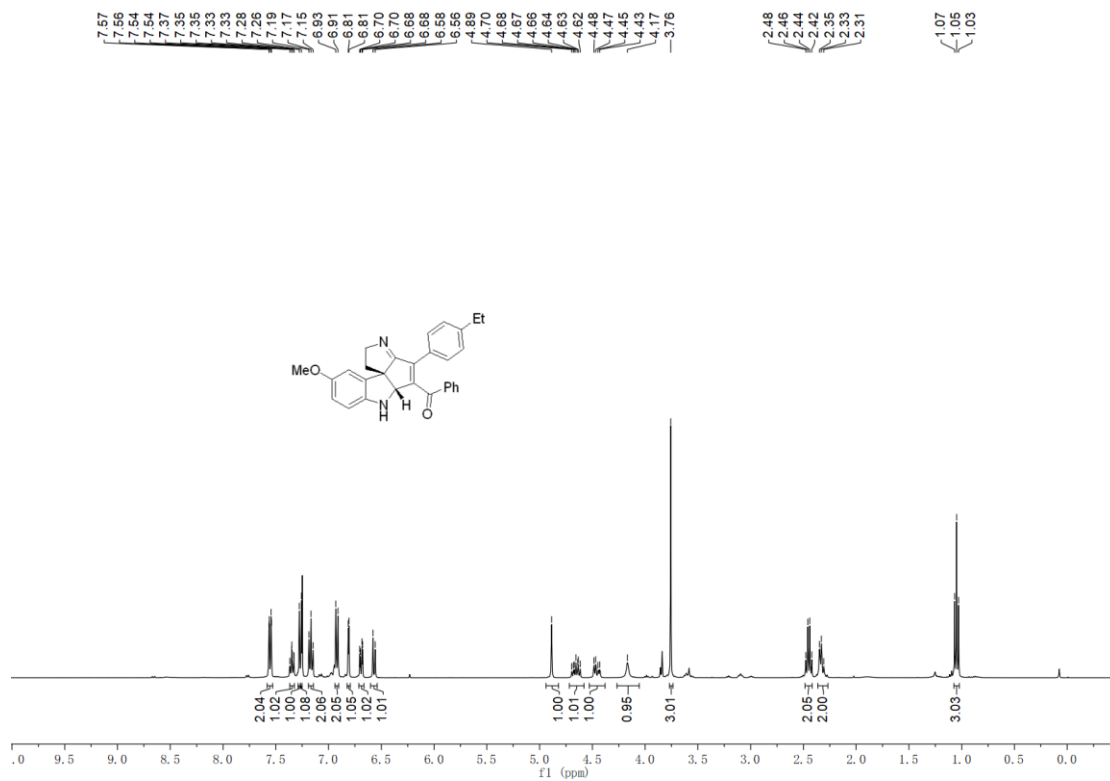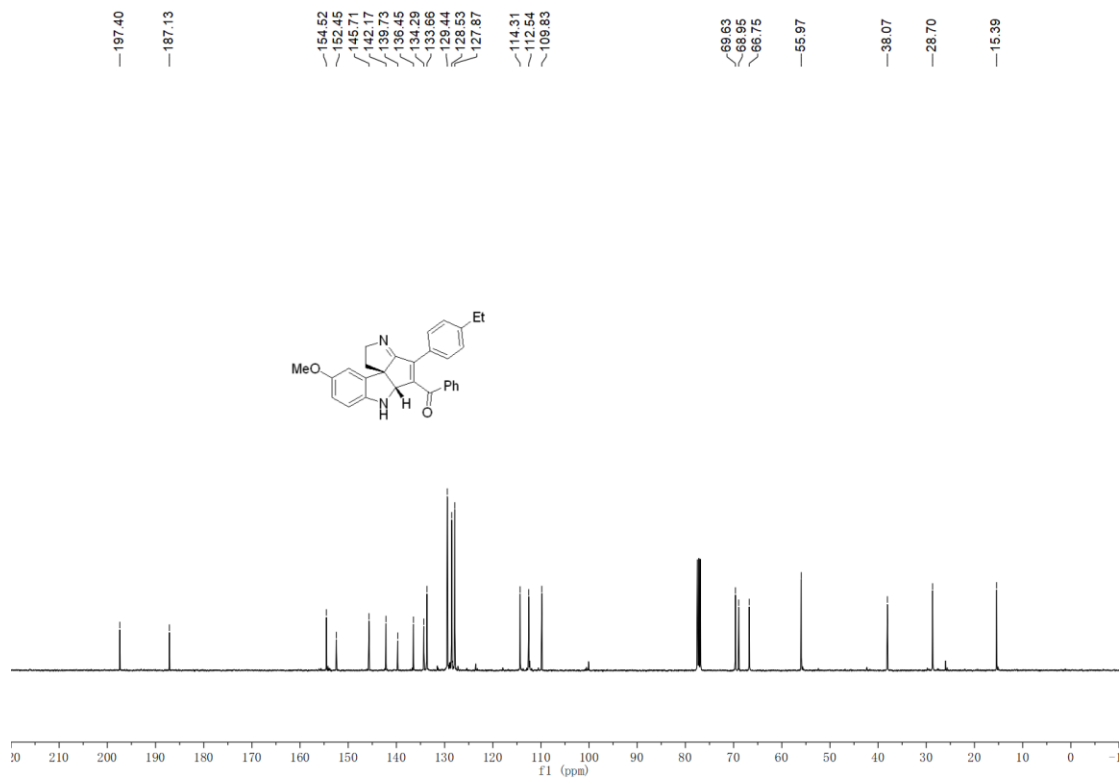

# Compound 4f

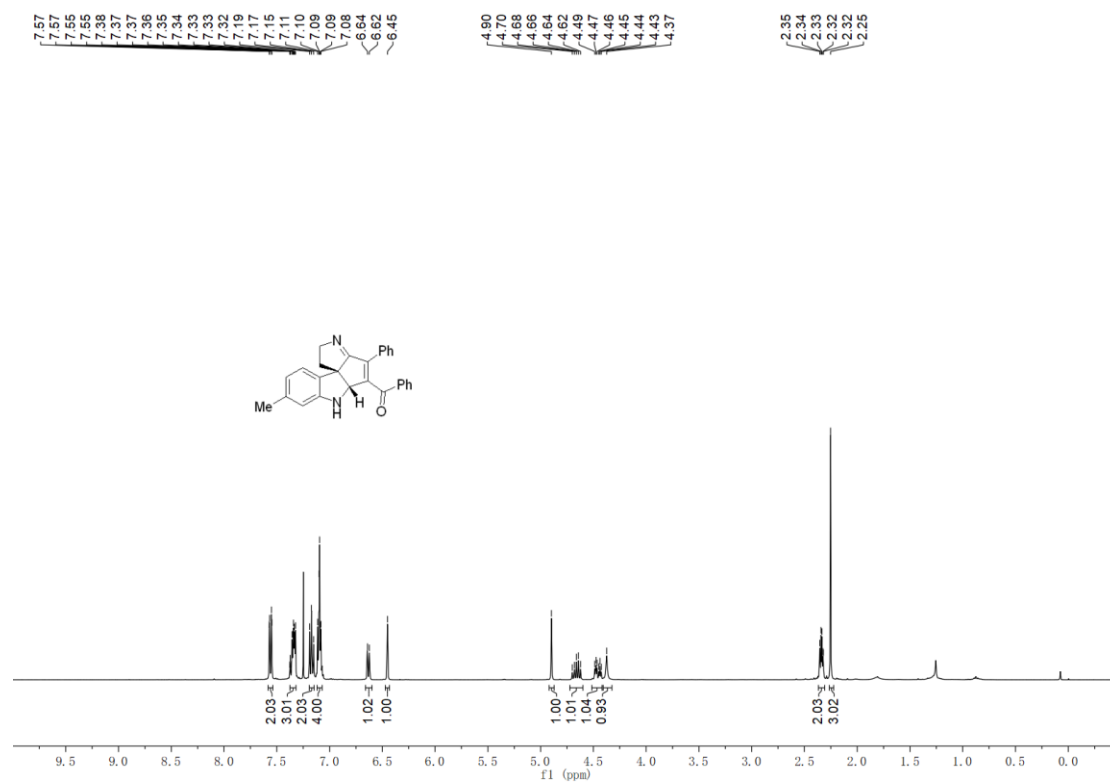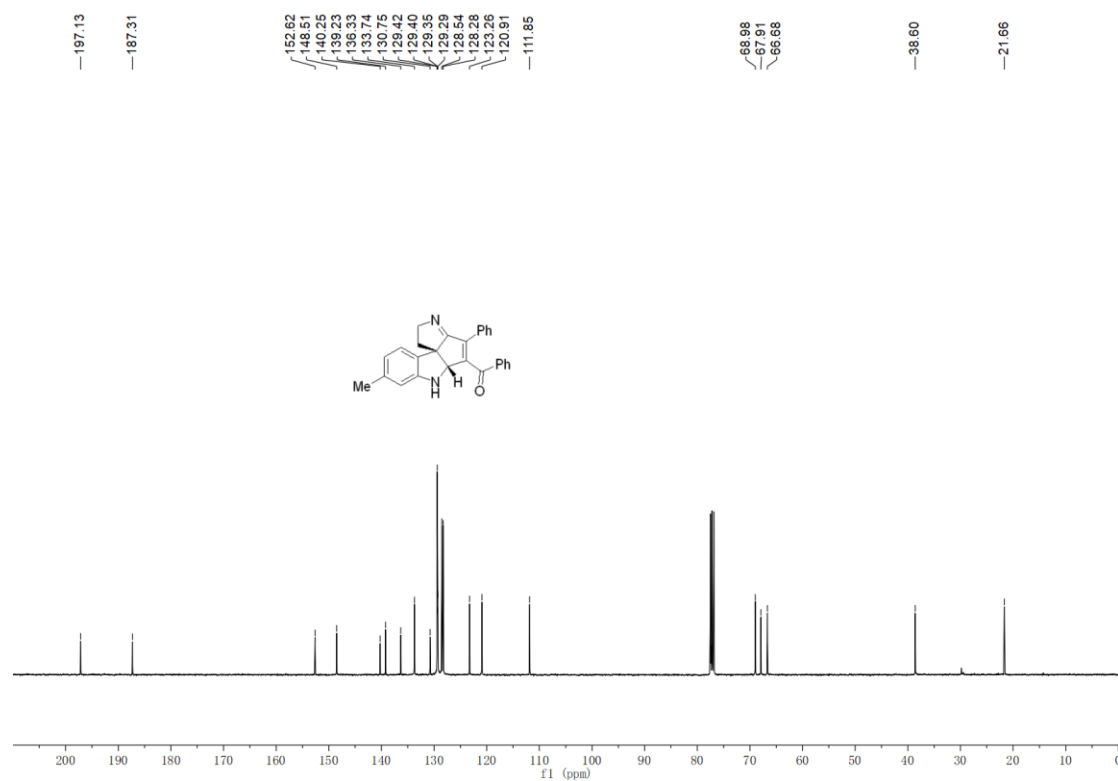

# Compound 8

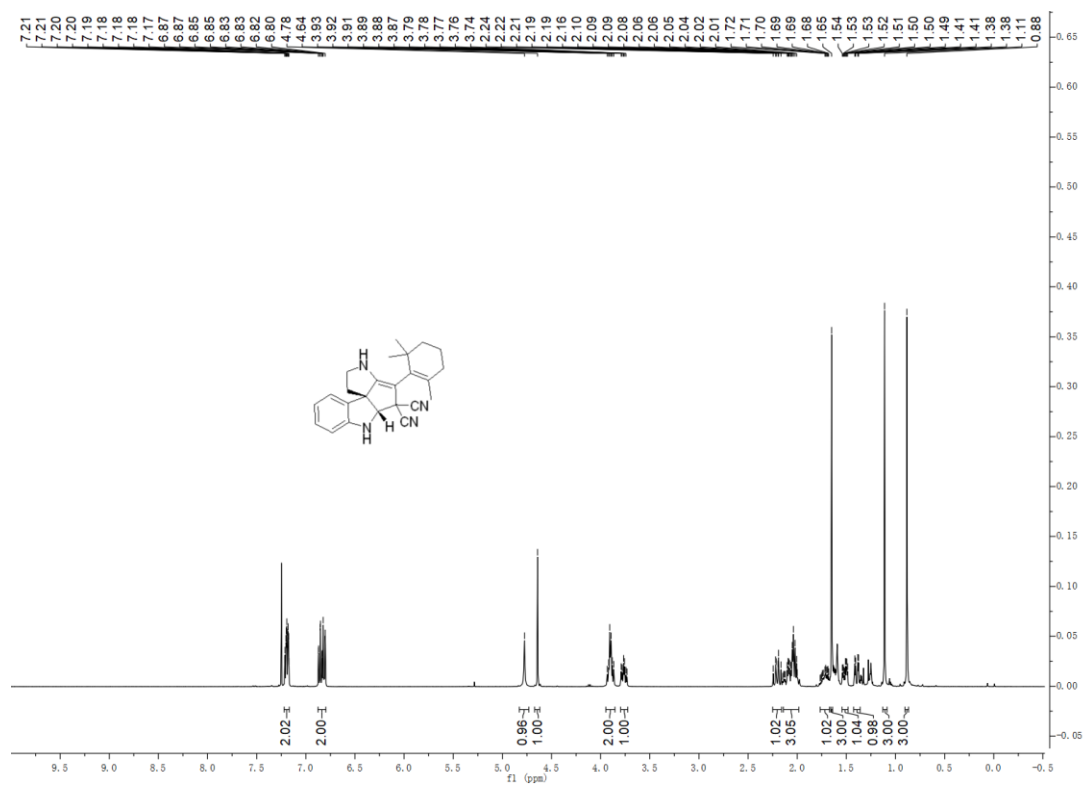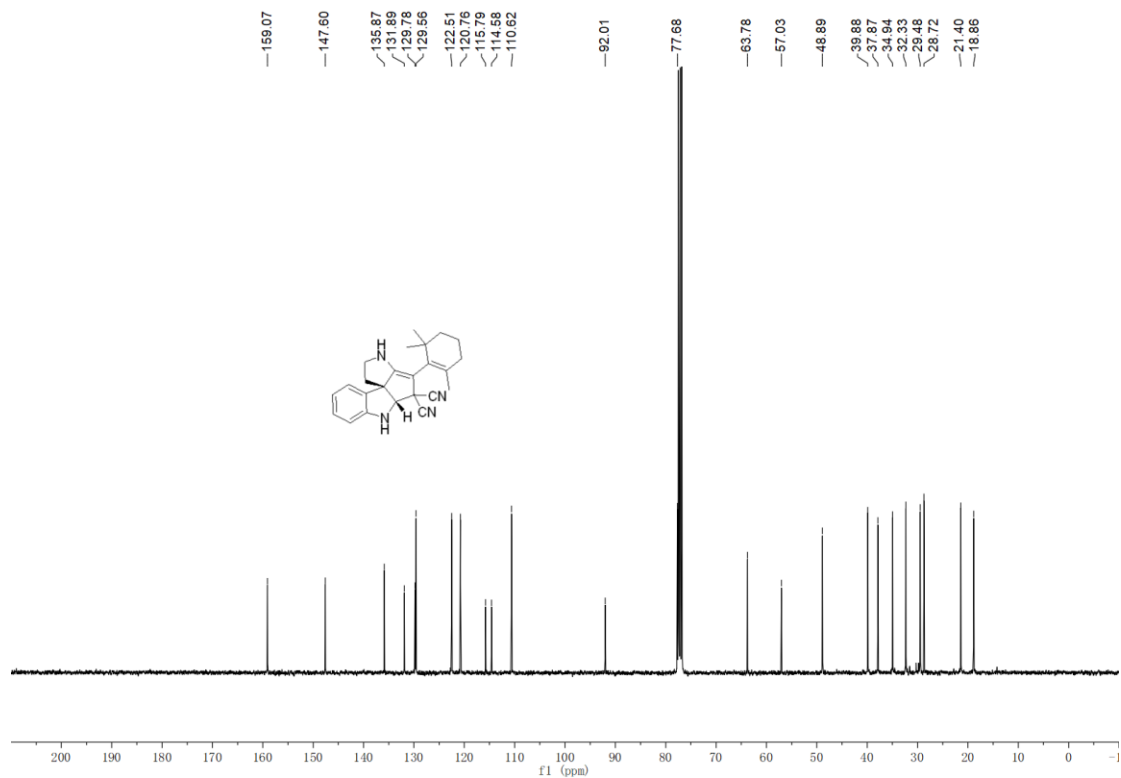

Supplement: d5nj01268f1.pdf [file d5nj01268f1.pdf]
